# Supplementary material for: Convergent, stereoselective syntheses of the glycosidase inhibitors broussonetines D and M
Source: Royal Society of Chemistry journal article supplement (doi:10.1039/b821431j), 2009-01-01

# Convergent, stereoselective syntheses of the glycosidase inhibitors broussonetines D and M

Celia Ribes,<sup>a</sup> Eva Falomir,<sup>a</sup> Miguel Carda,<sup>a</sup> Juan Murga,<sup>a</sup> and J. Alberto Marco<sup>b</sup>

<sup>a</sup>*Departamento de Química Inorgánica y Orgánica, Universidad Jaume I, E-12080 Castellón, Spain; and* <sup>b</sup>*Departamento de Química Orgánica, Universidad de Valencia, E-46100 Burjassot, Valencia, Spain*

For Senior Author:

J.A. Marco

-Mailing address: as above  
-Phone No.: 34-96-3544337  
-Fax No.: 34-96-3544328  
-E-Mail: alberto.marco@uv.es

## *Supporting Information*

### *Contents:*

*S-2/S-33: <sup>1</sup>H and <sup>13</sup>C NMR spectra of new compounds*

## NMR Spectra of new compounds

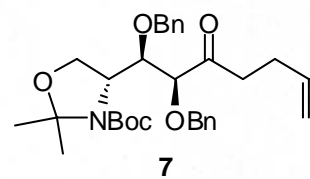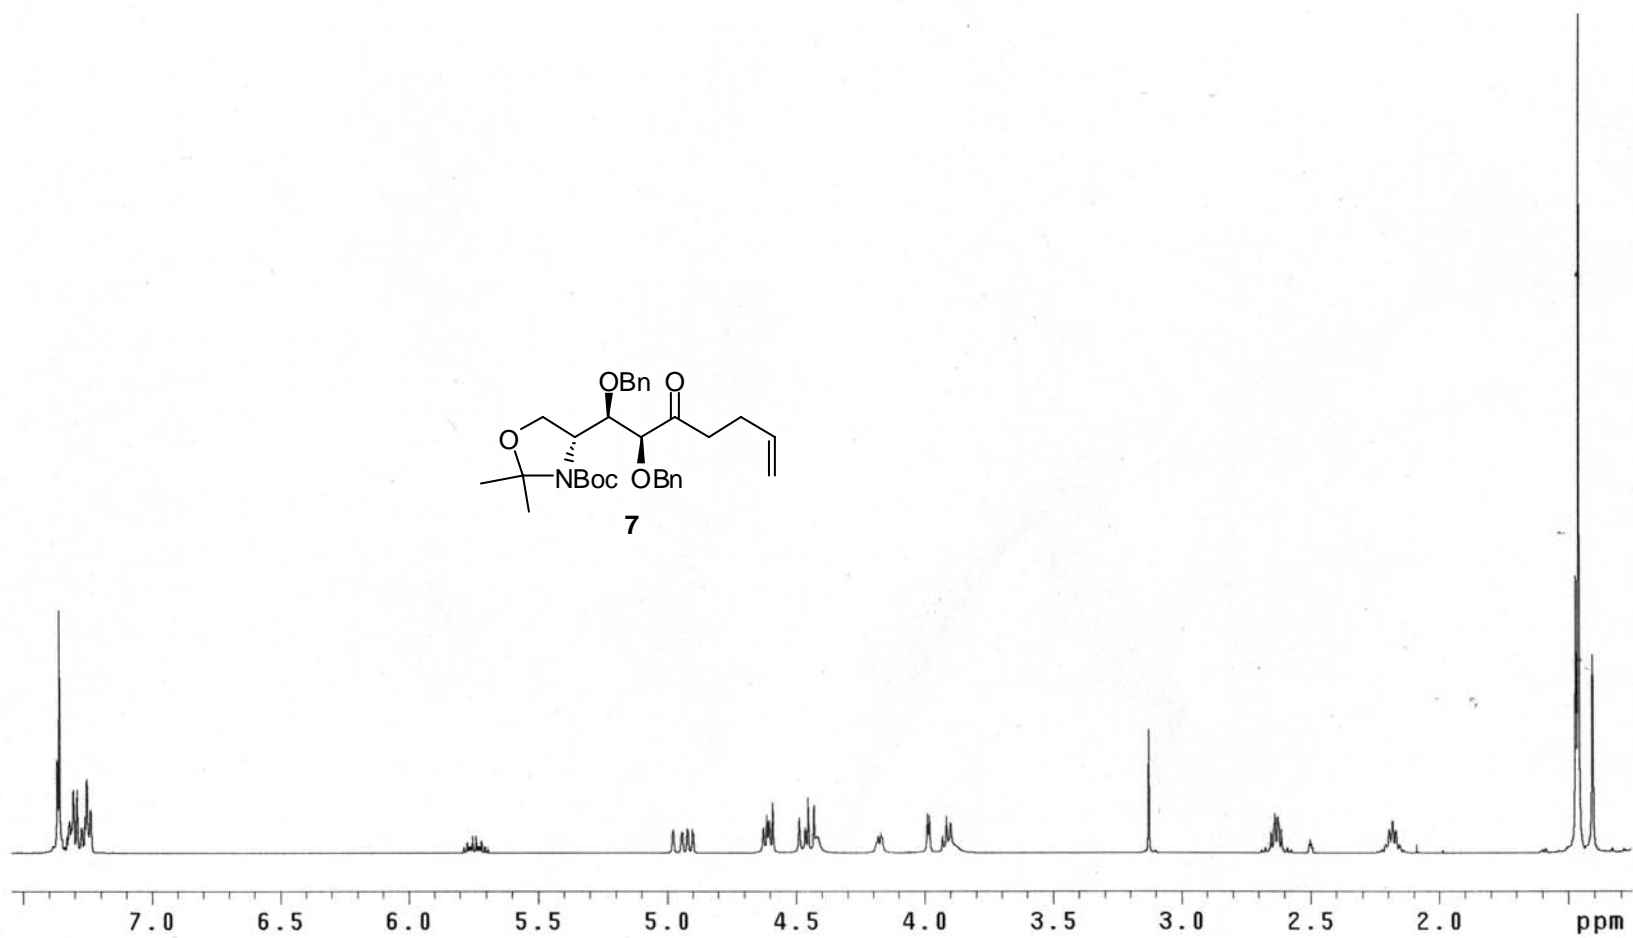

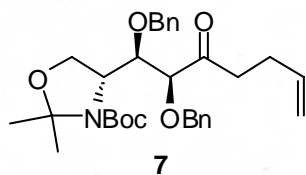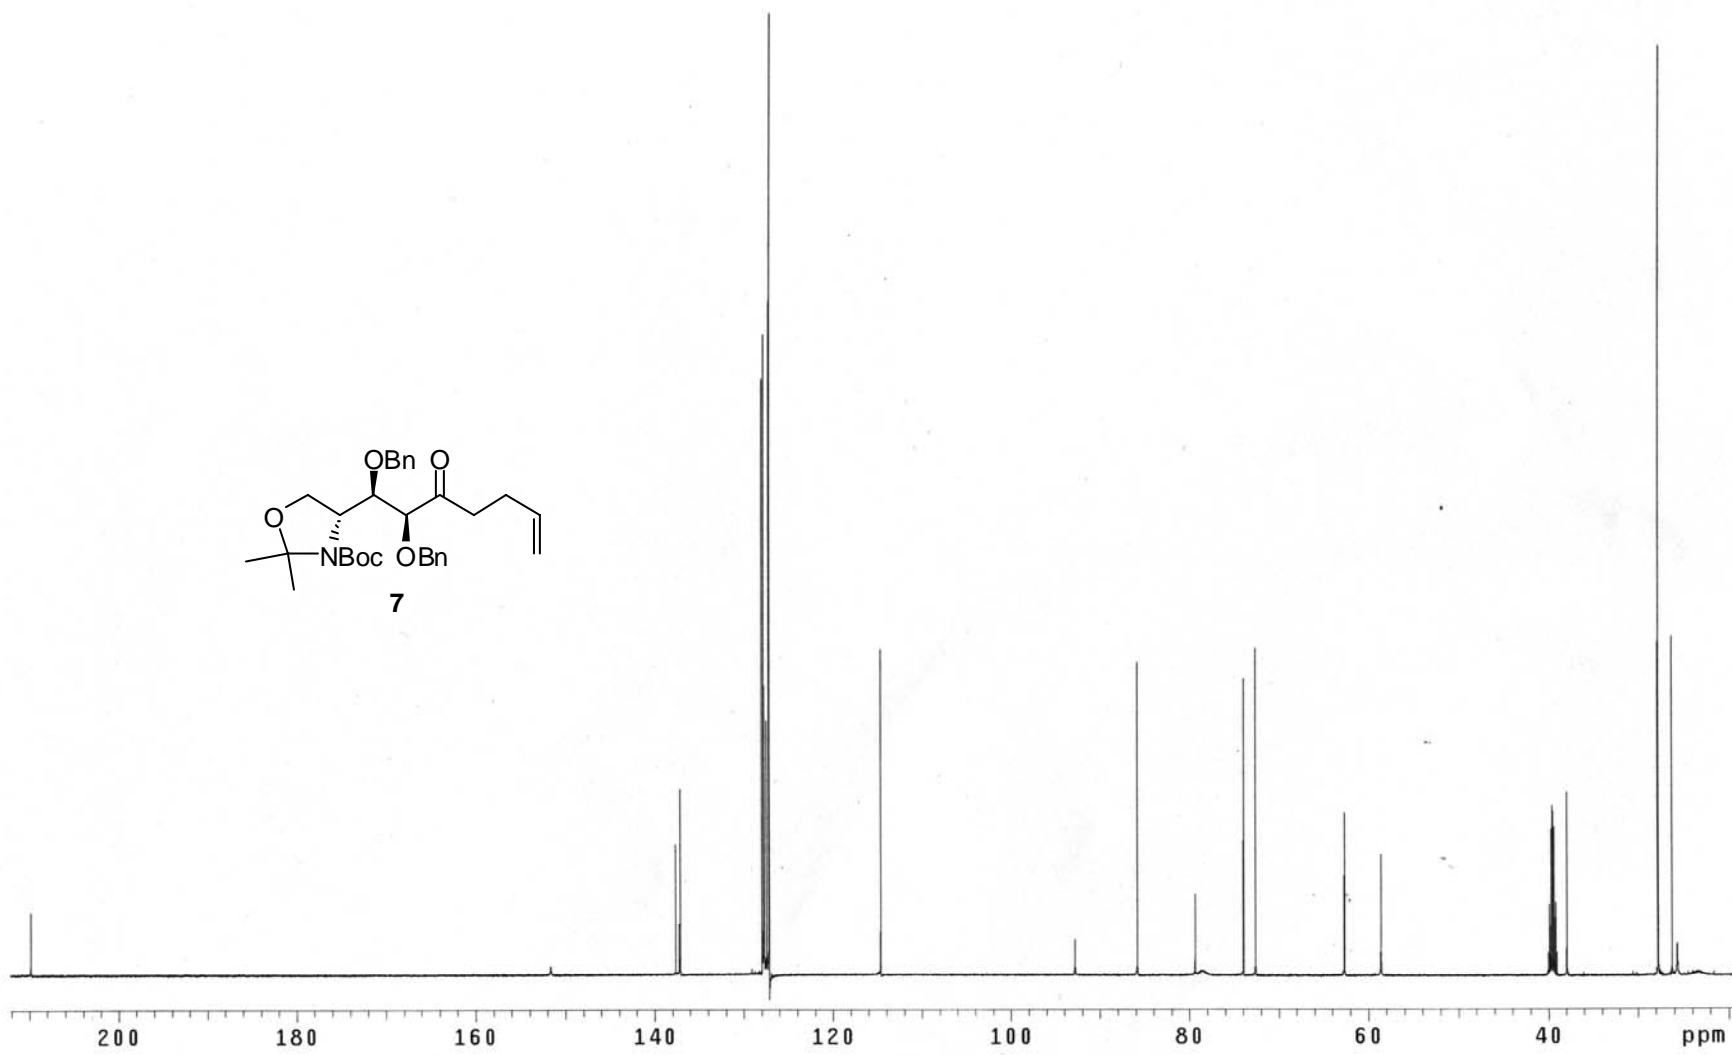

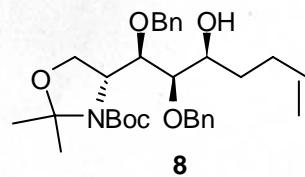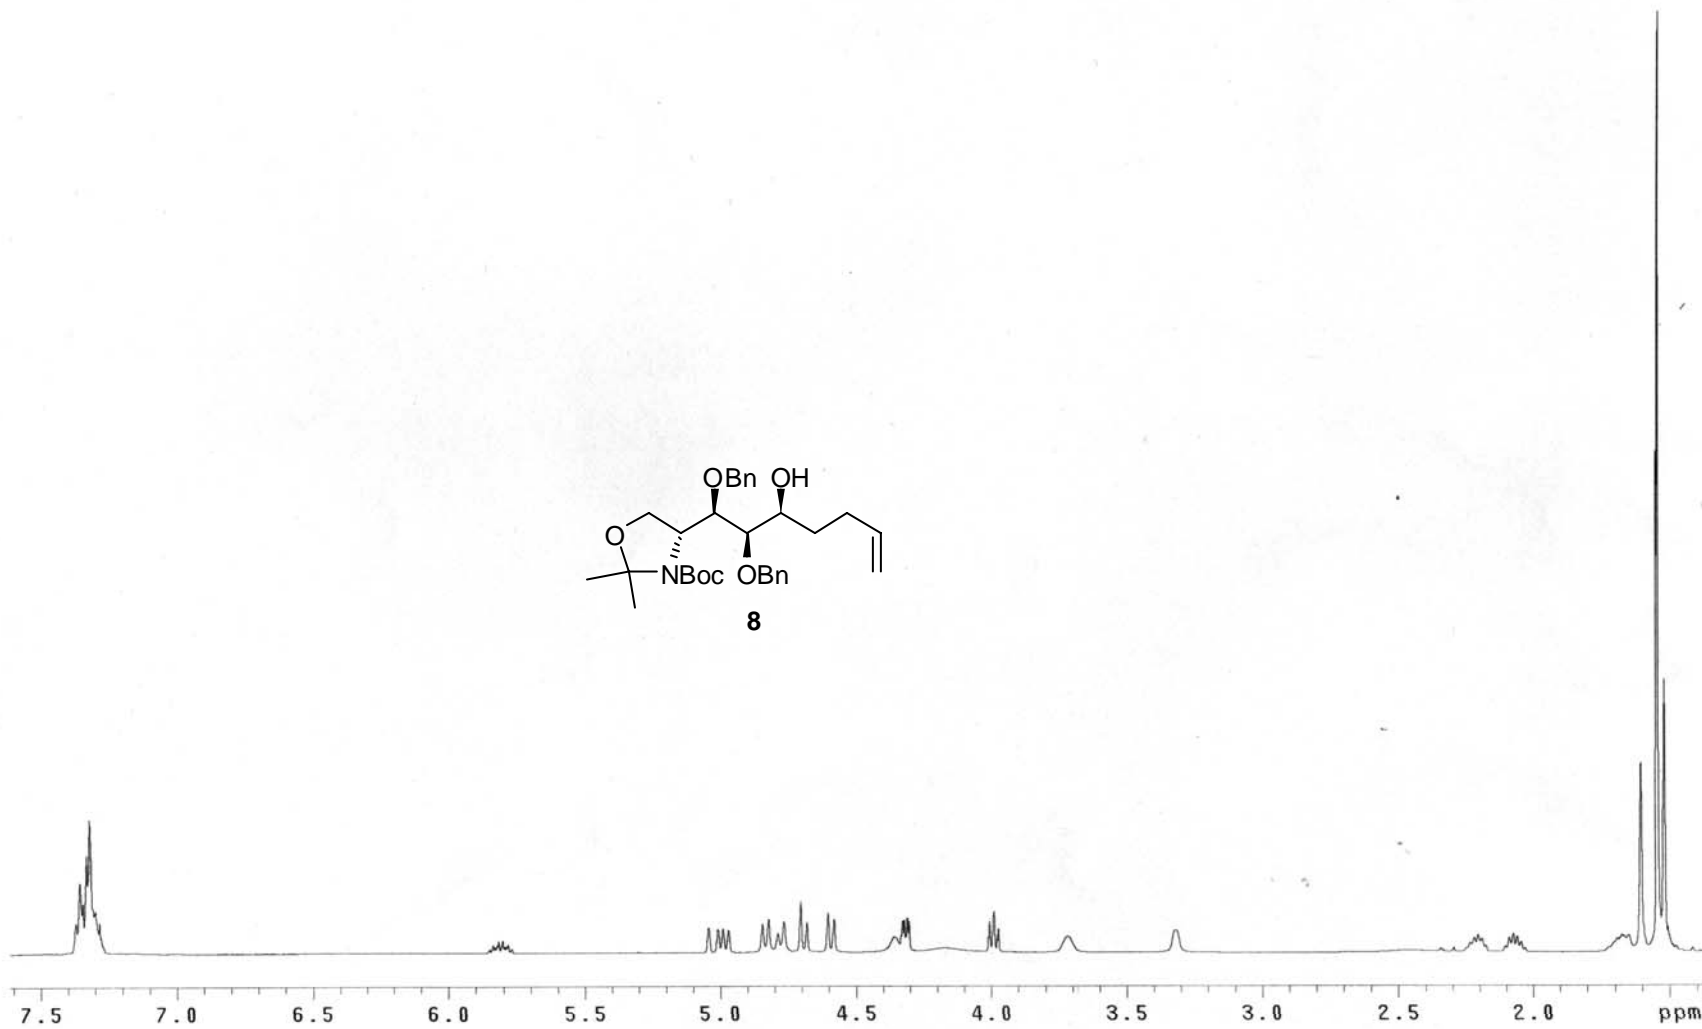

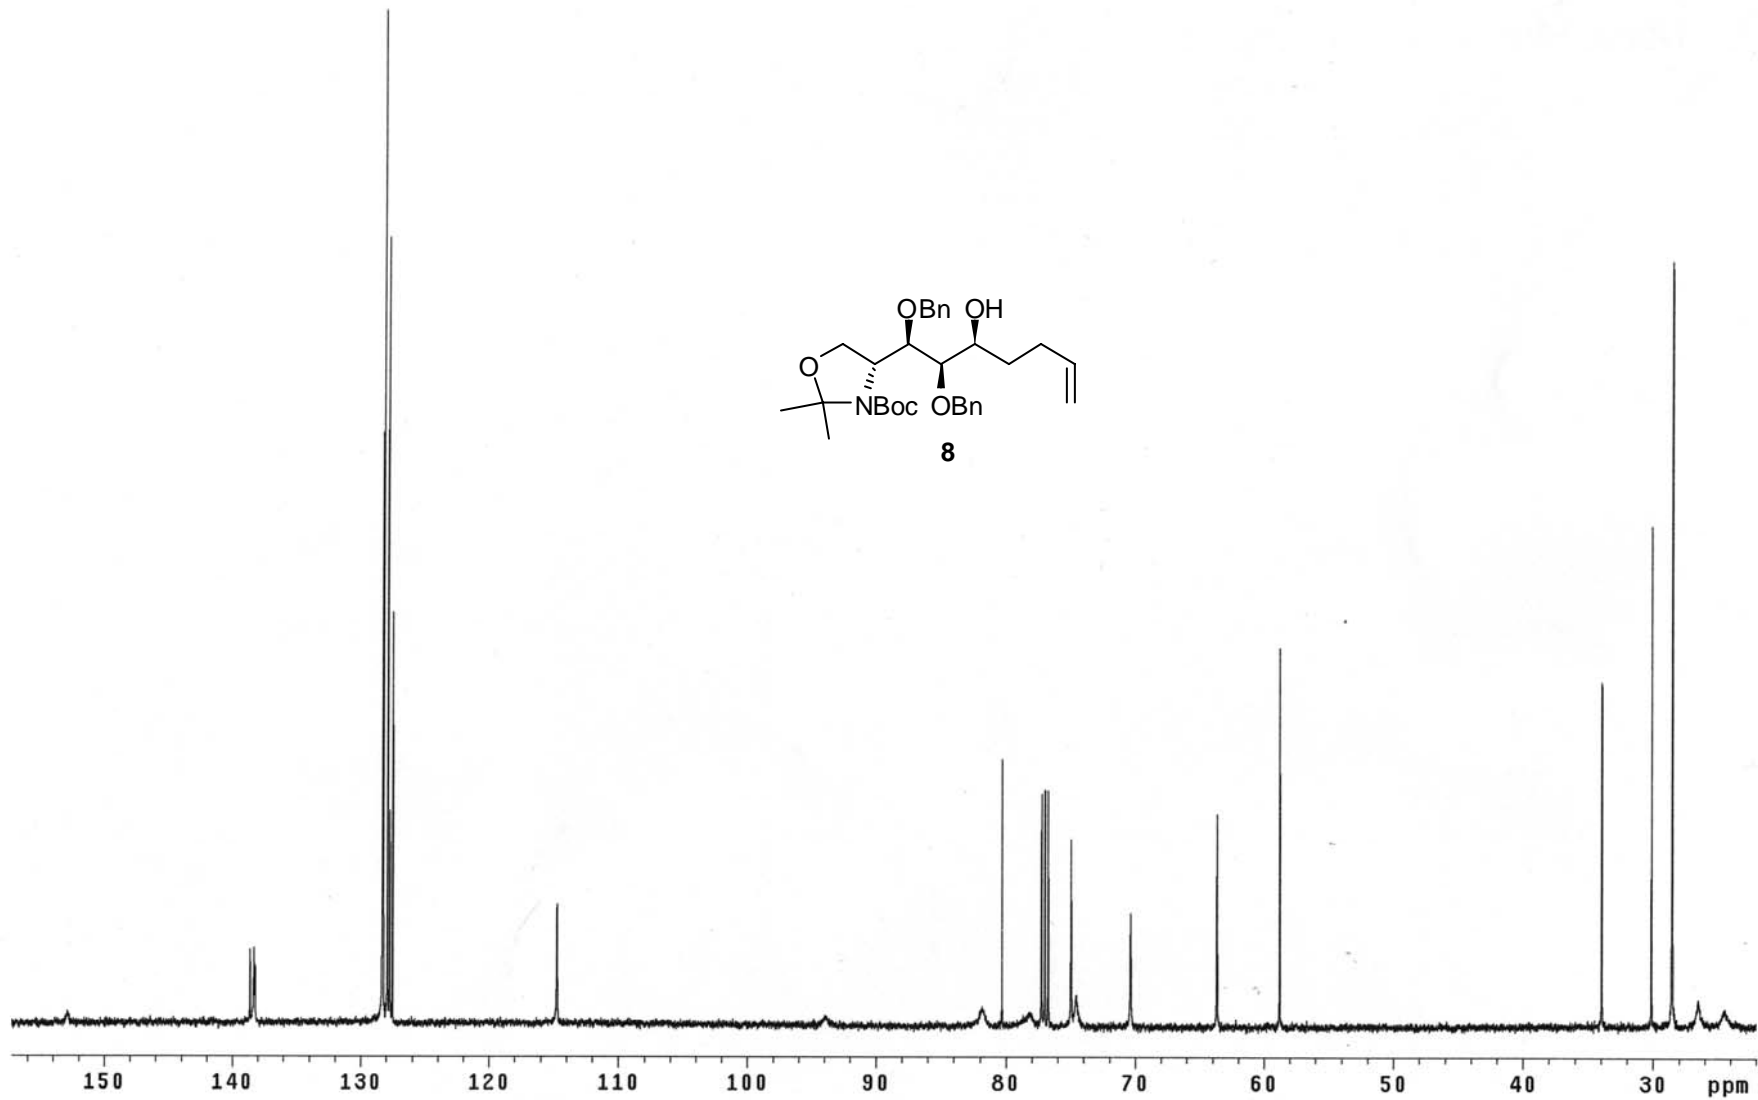

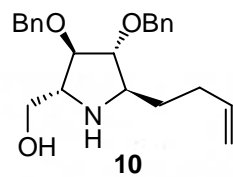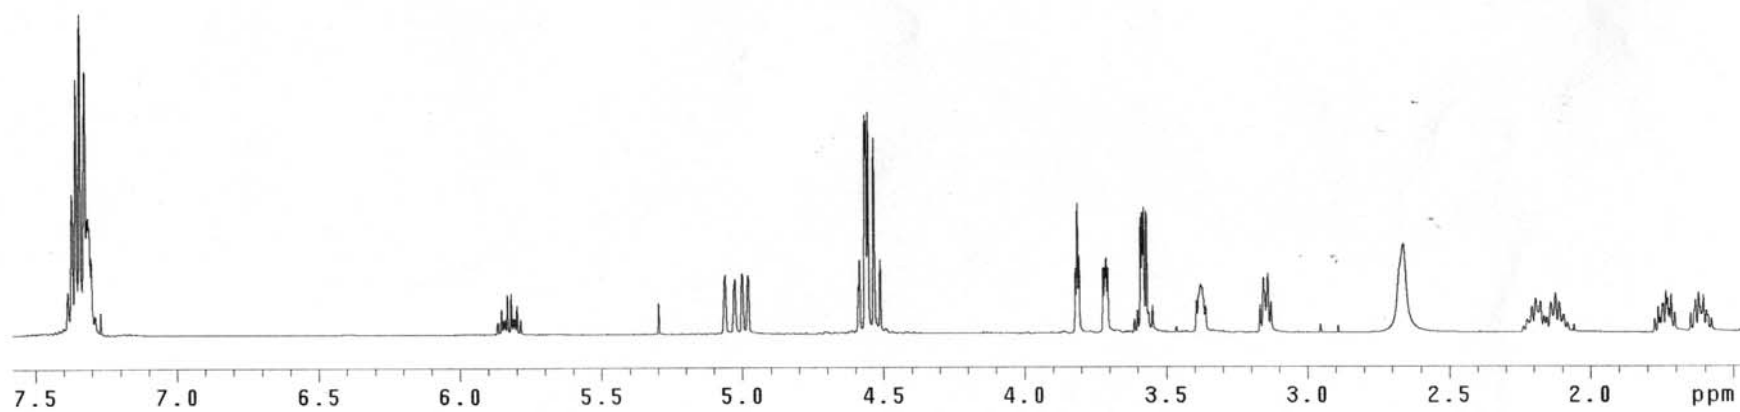

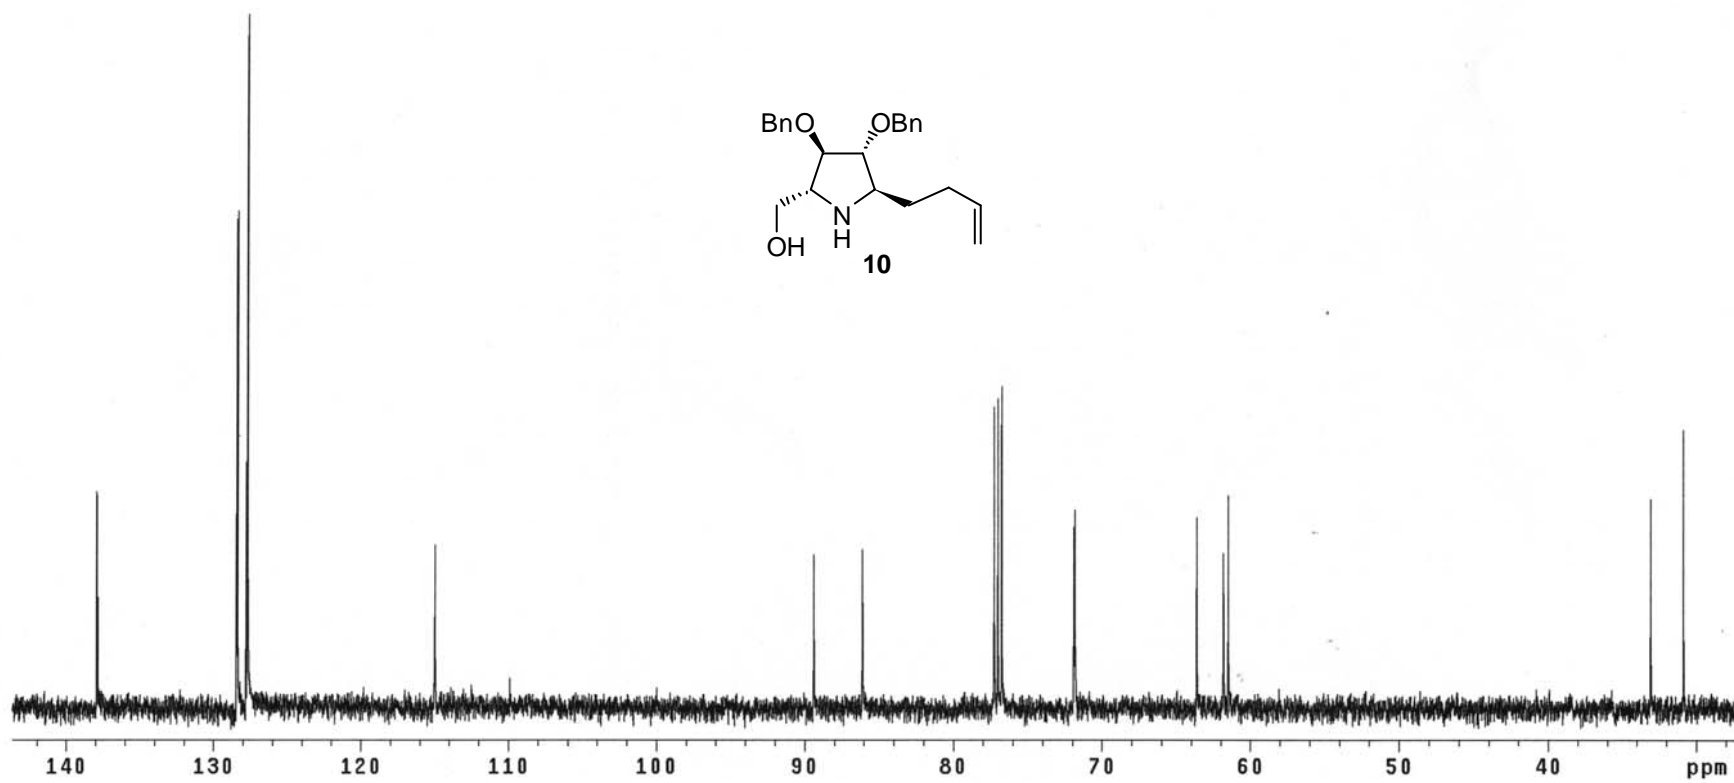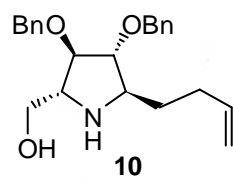

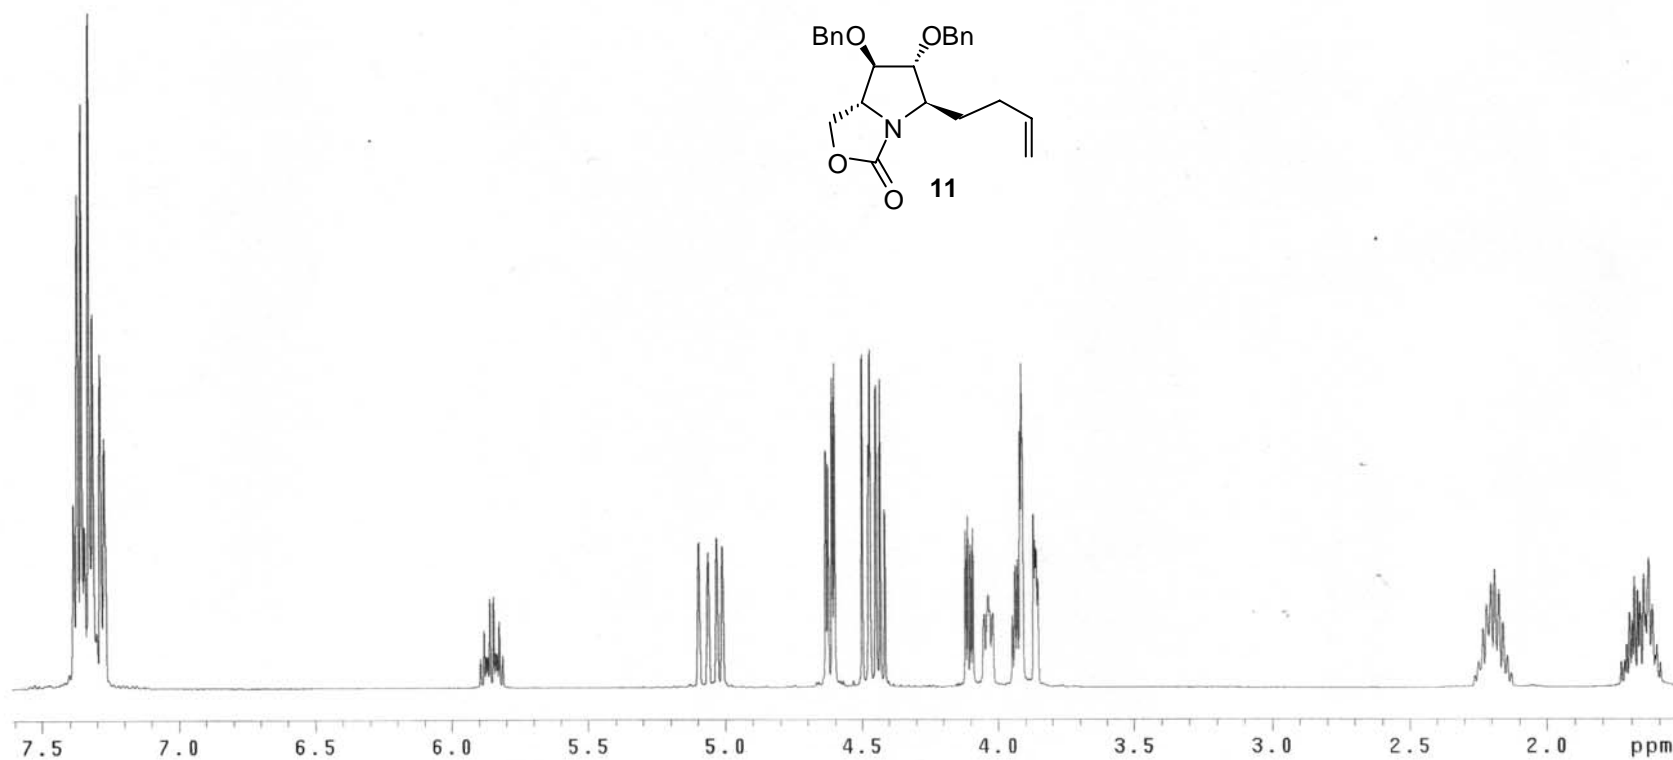



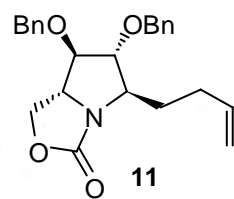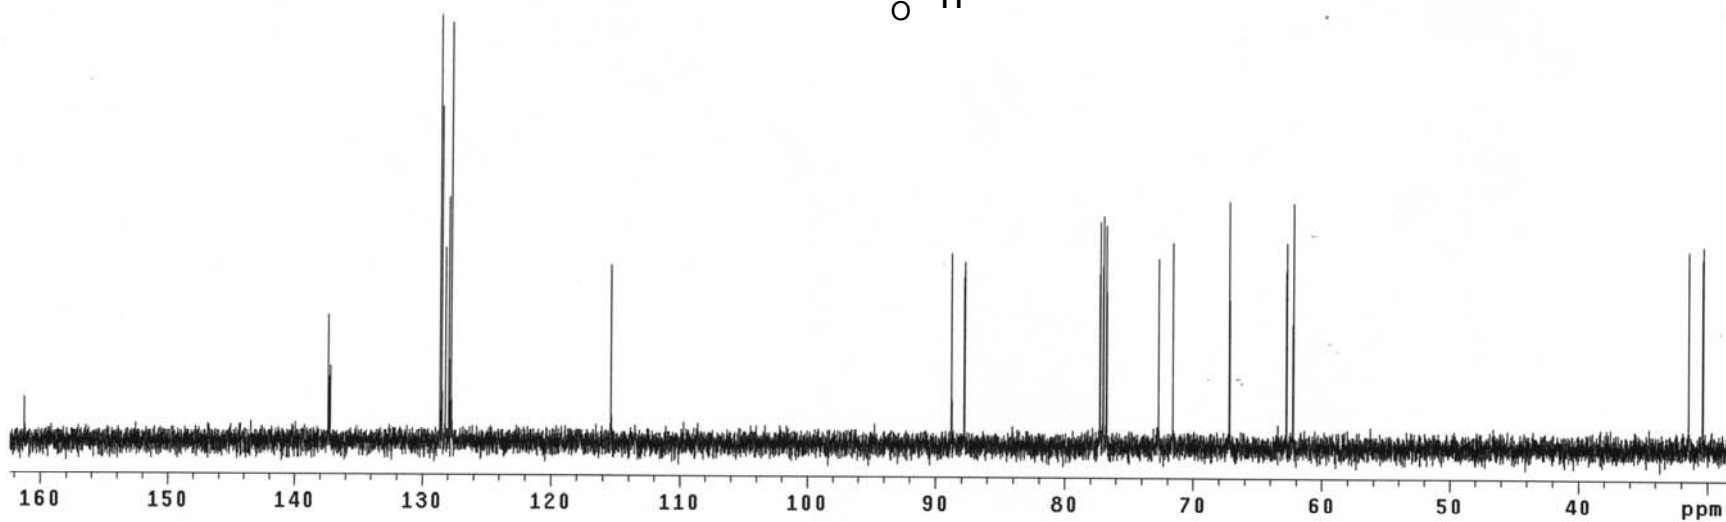

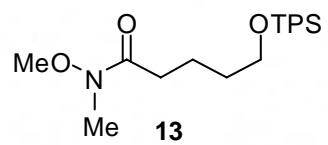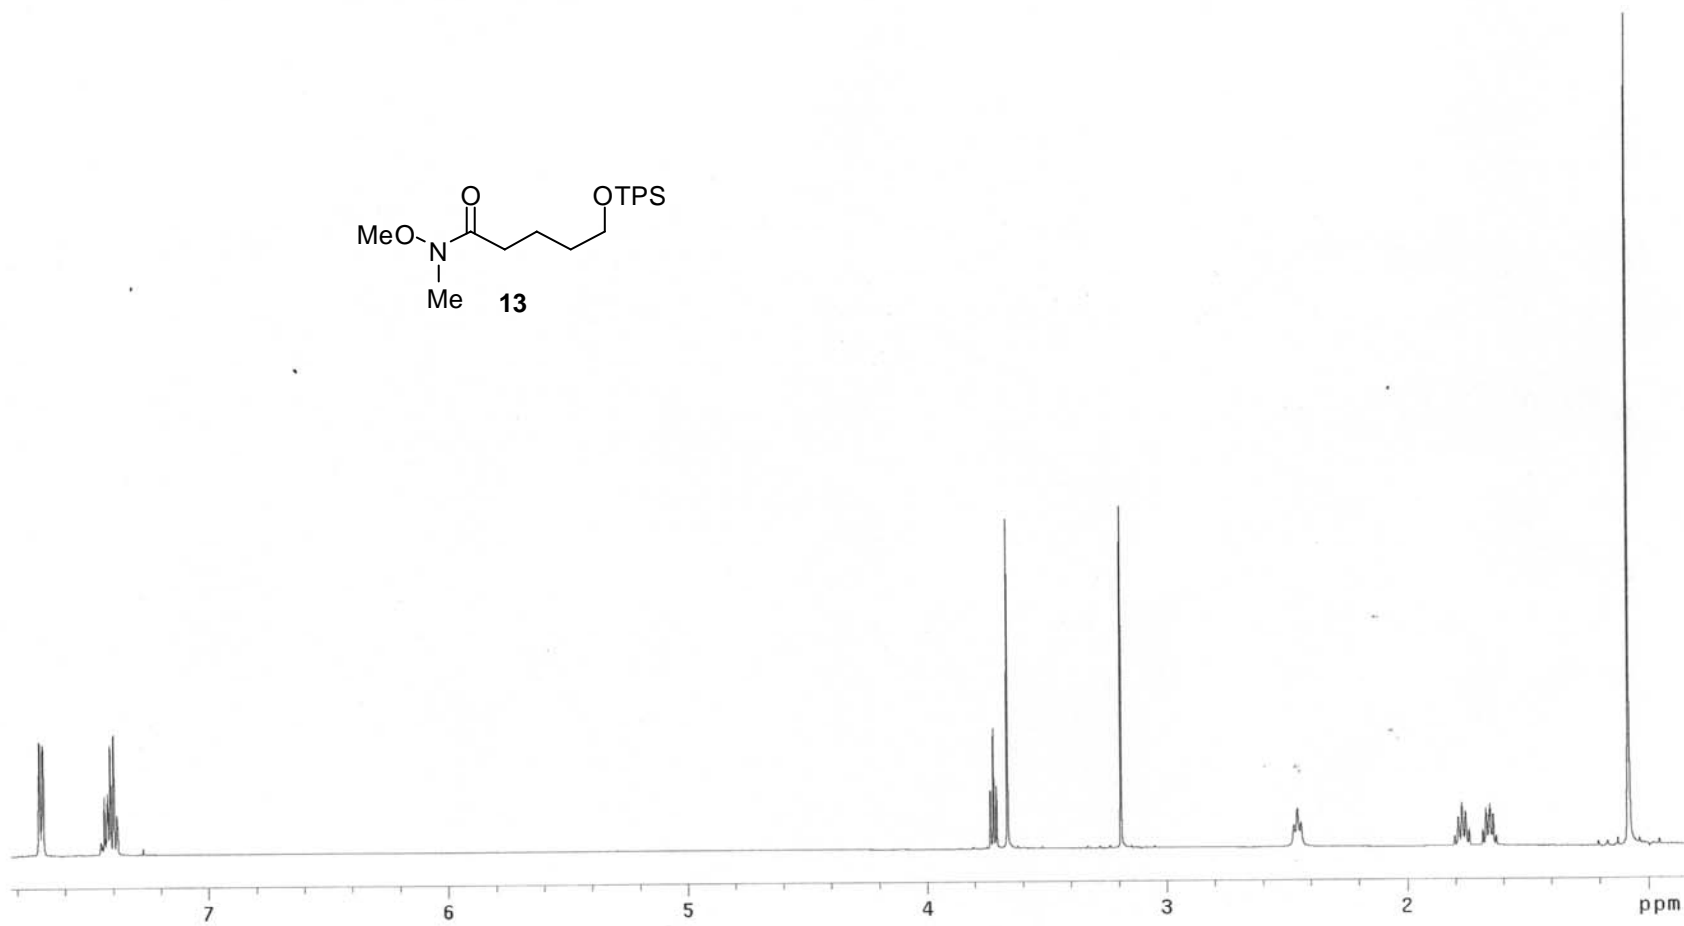

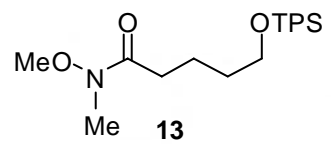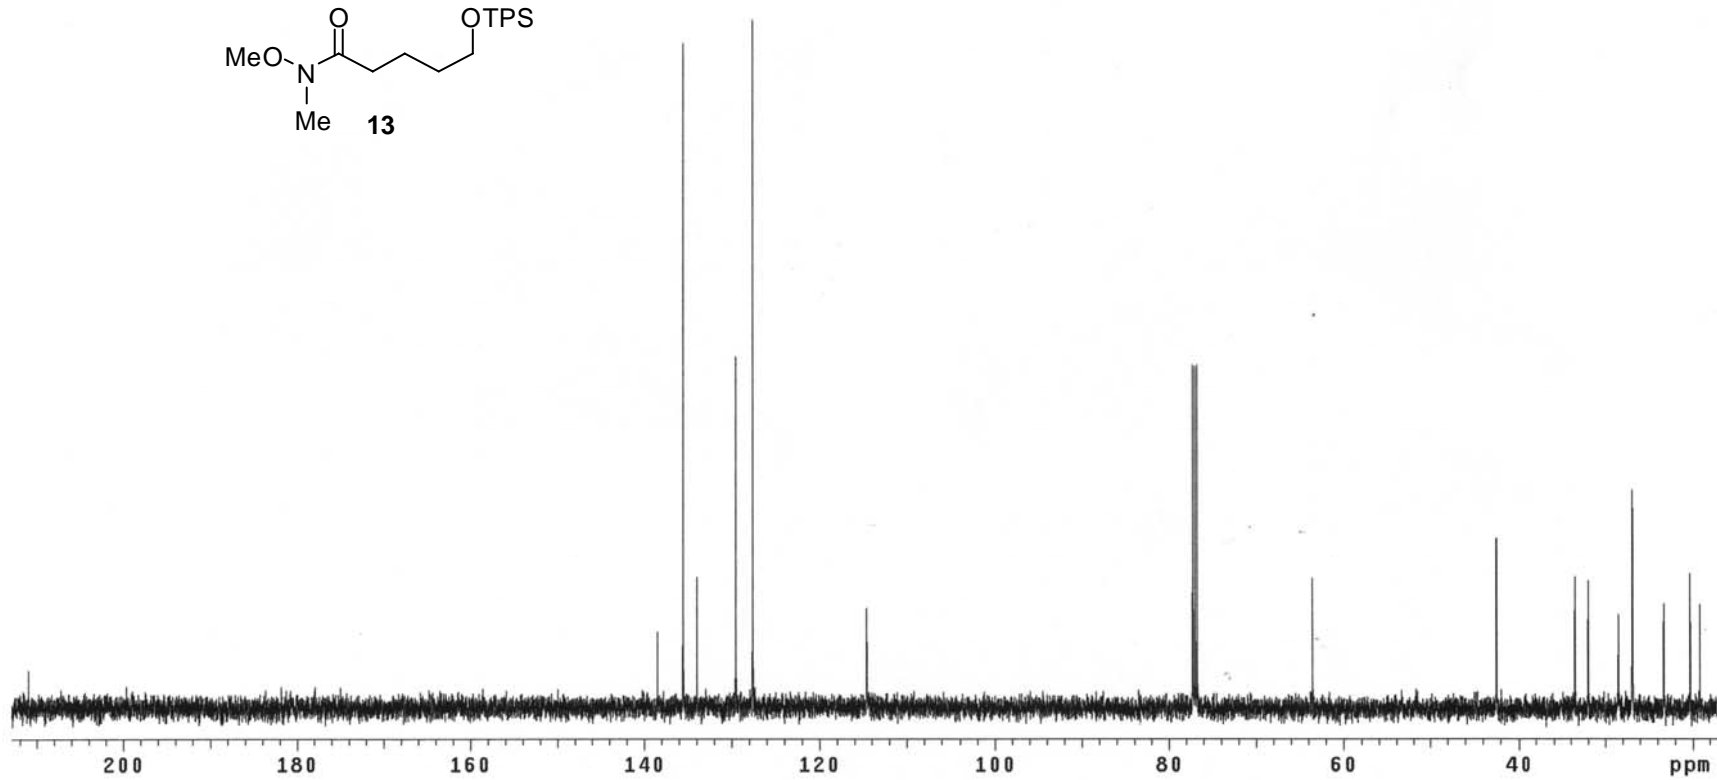

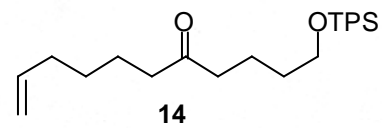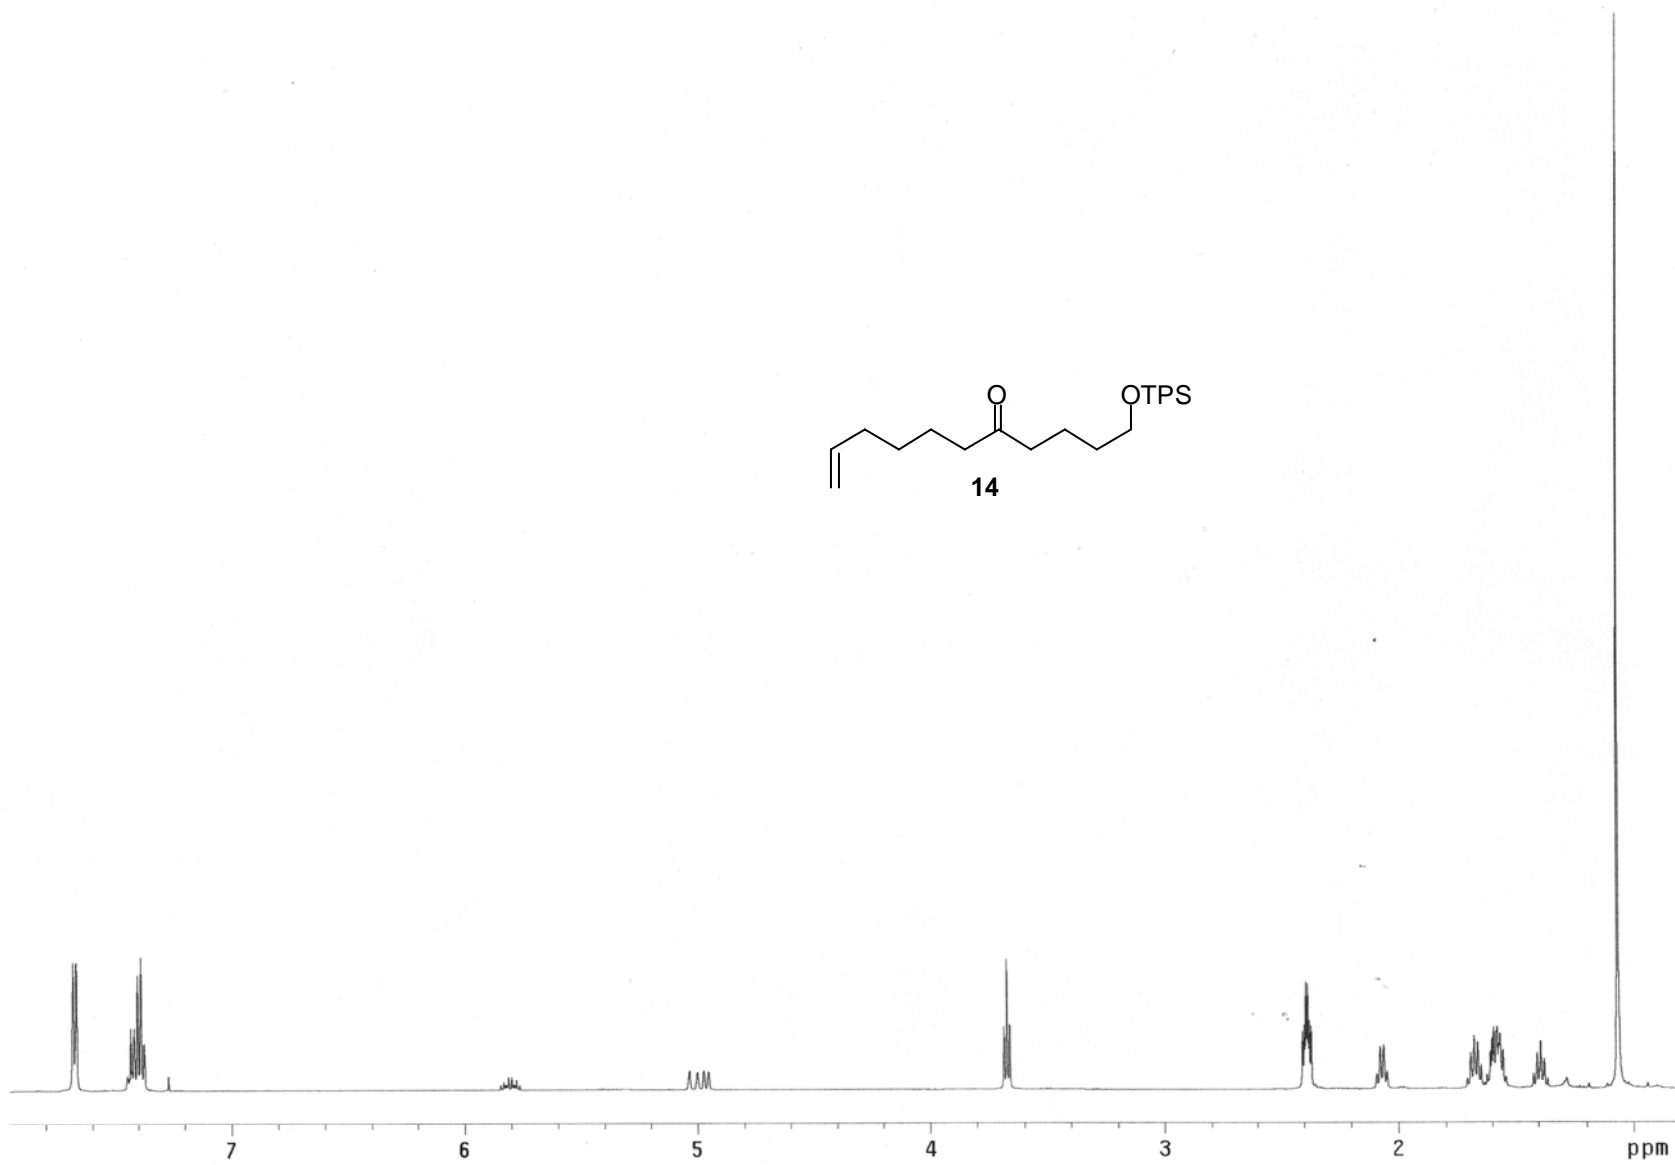

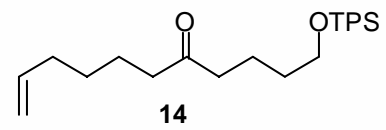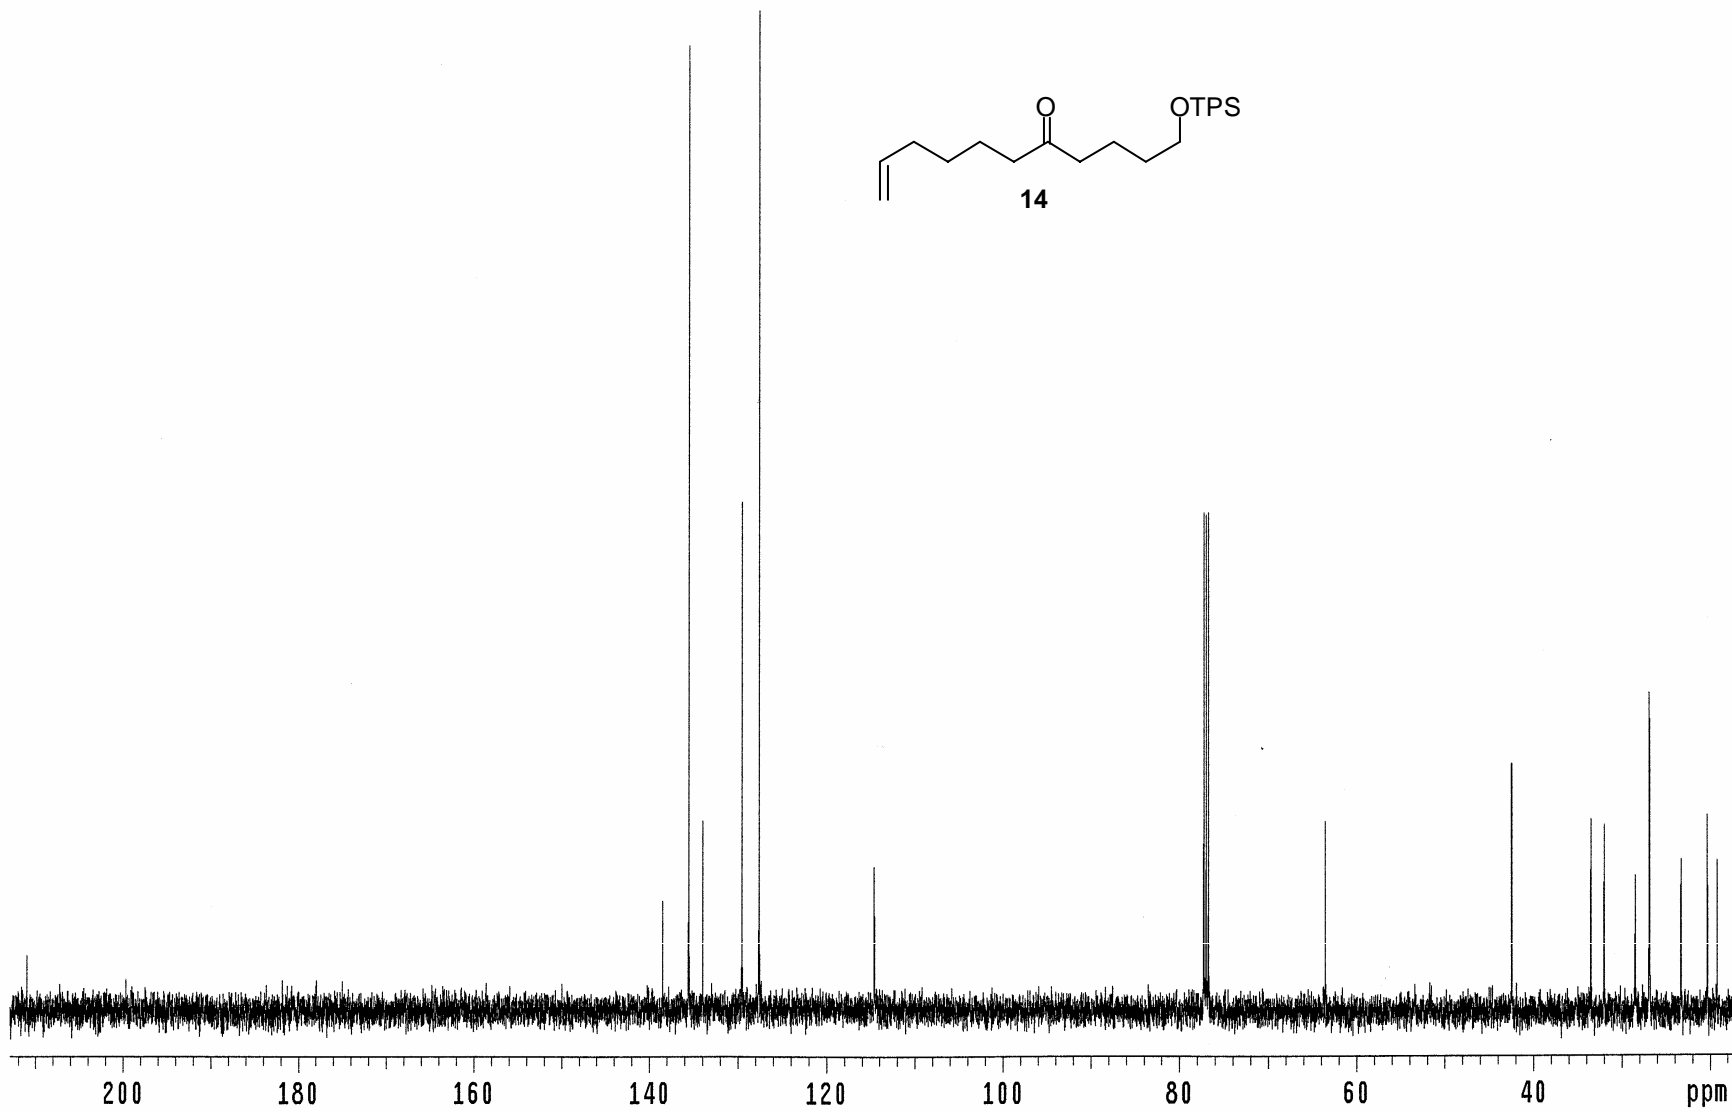

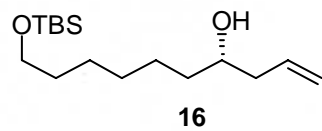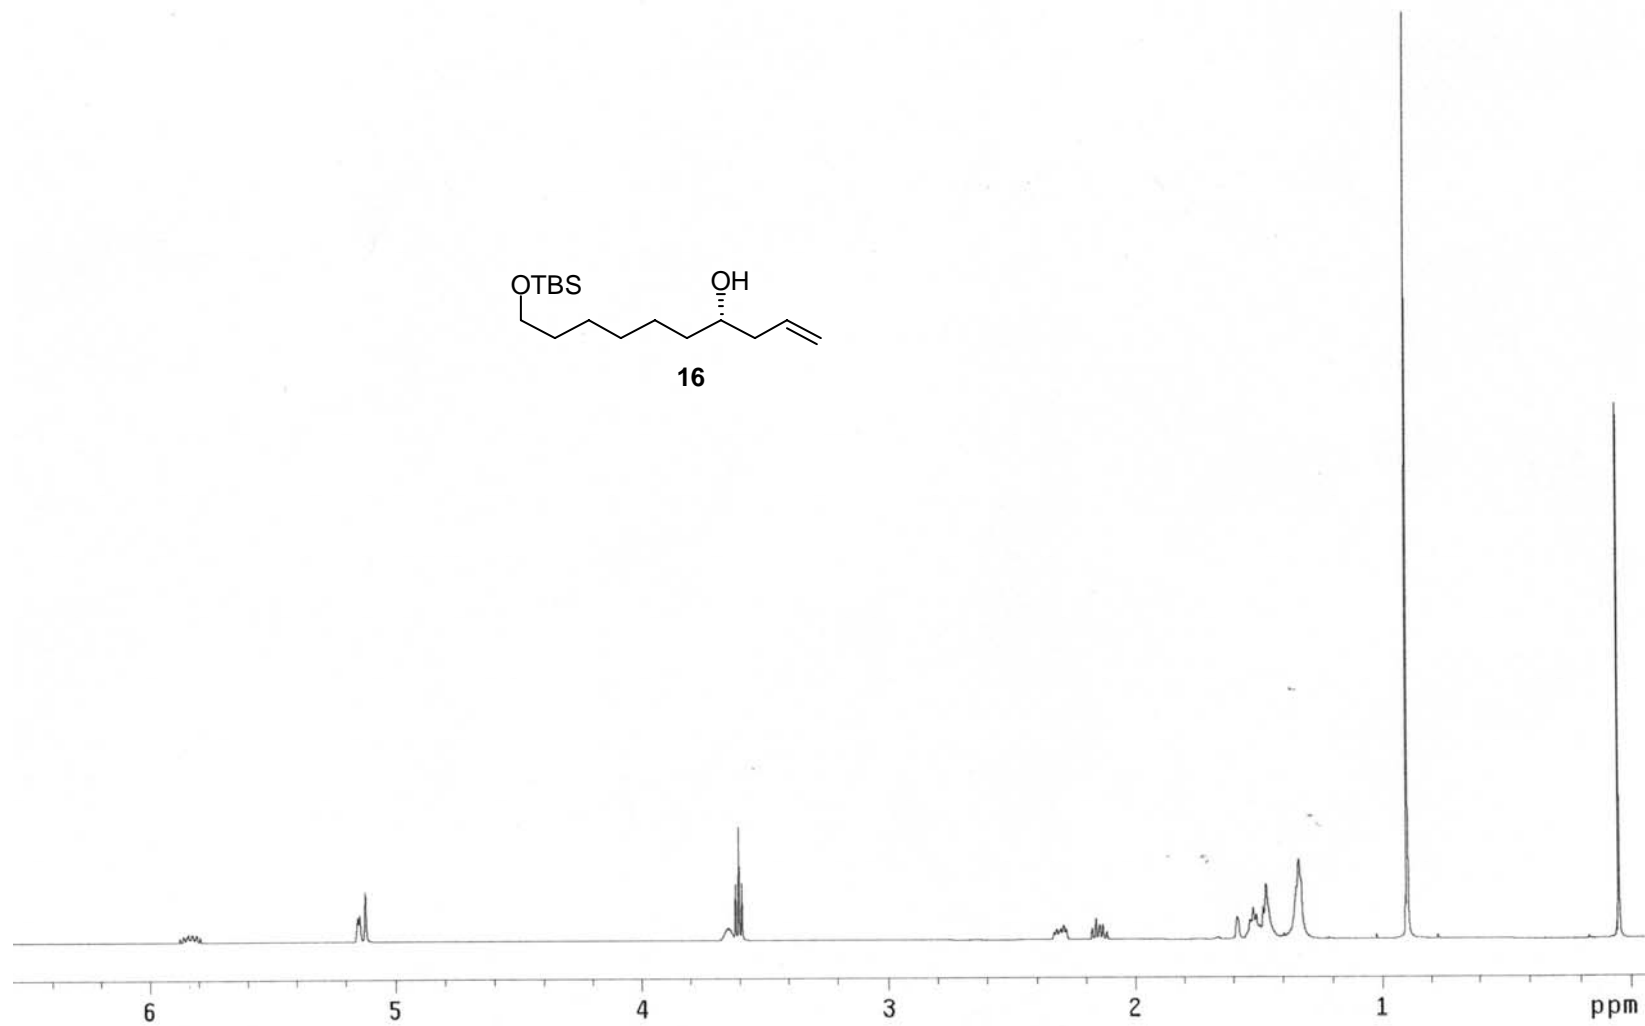

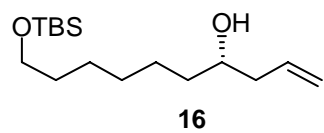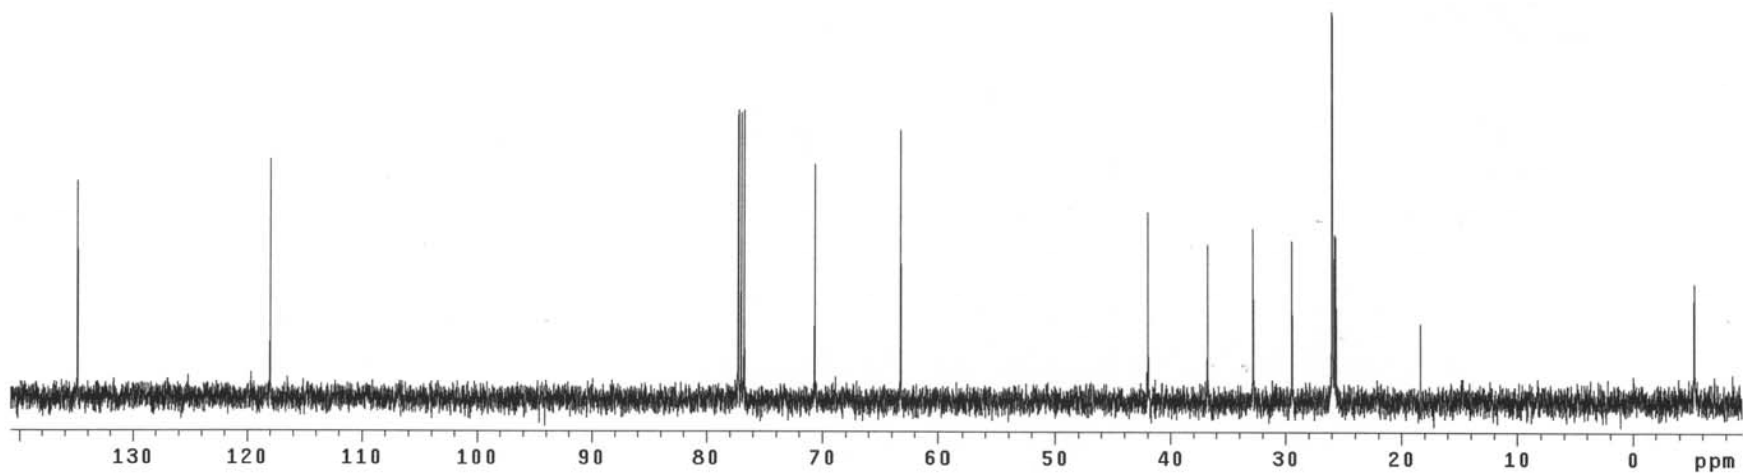

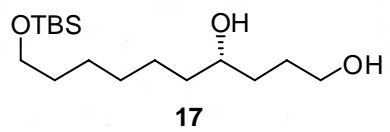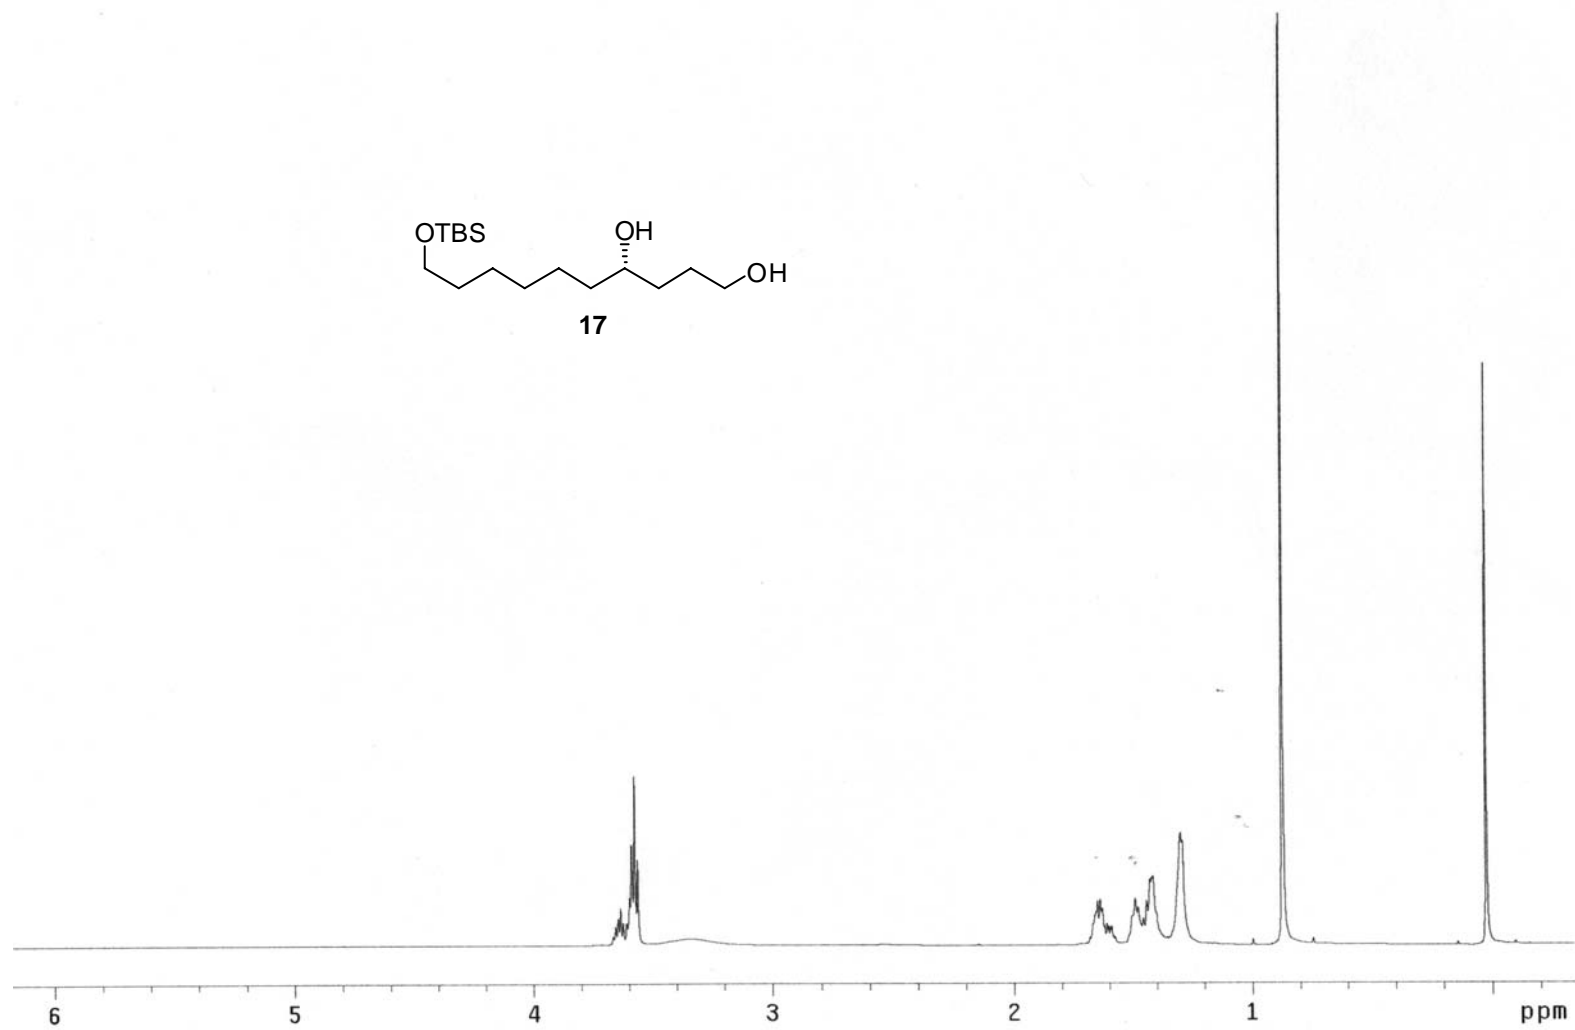



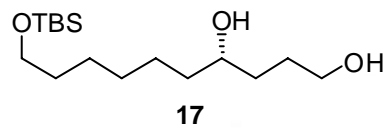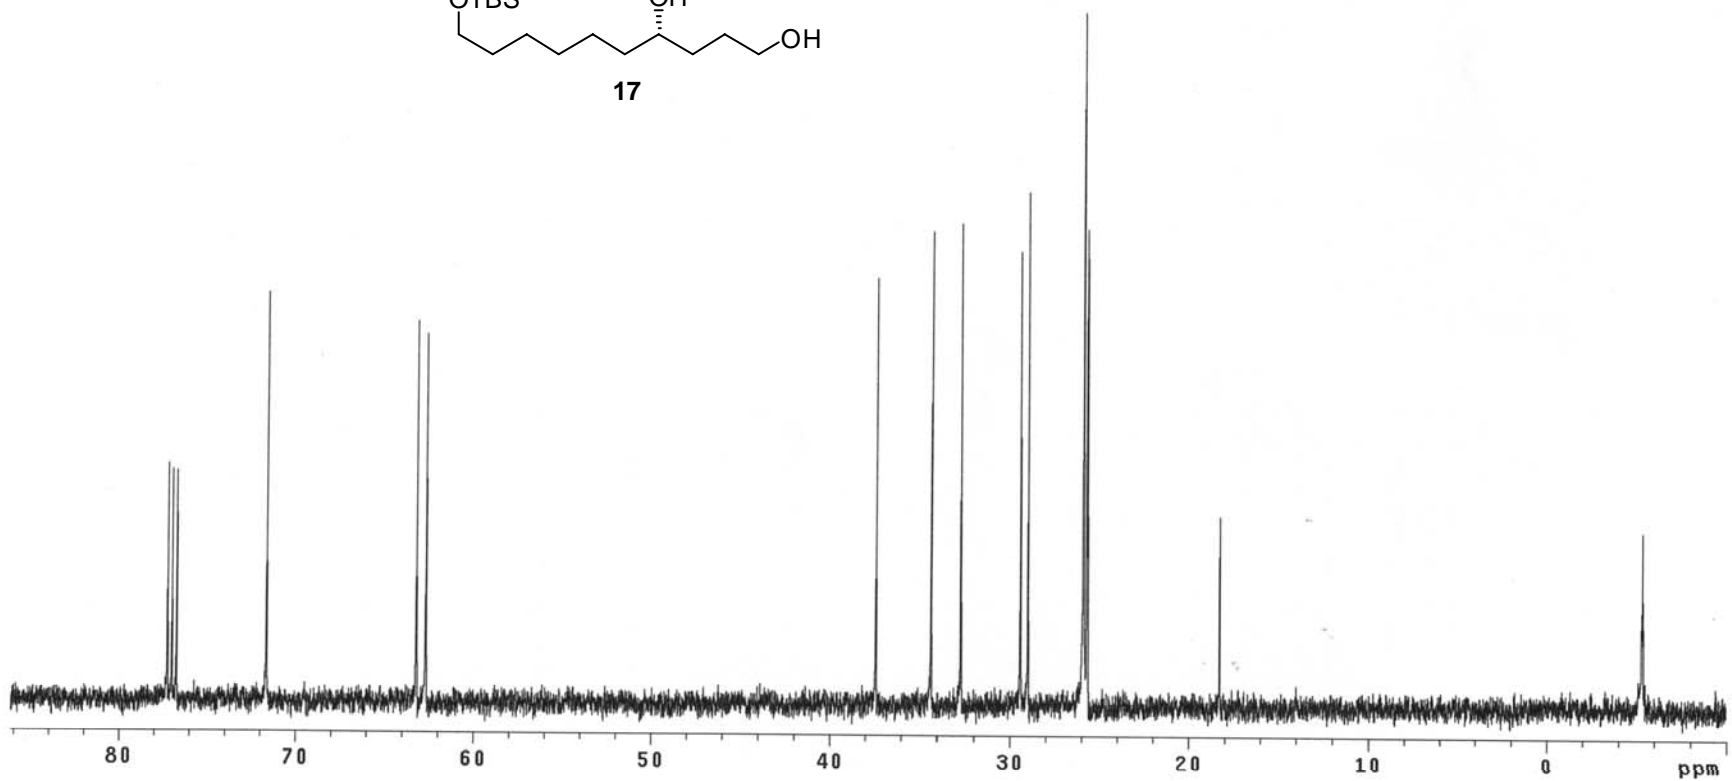

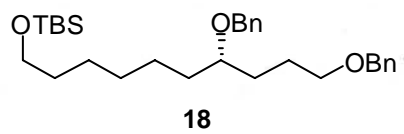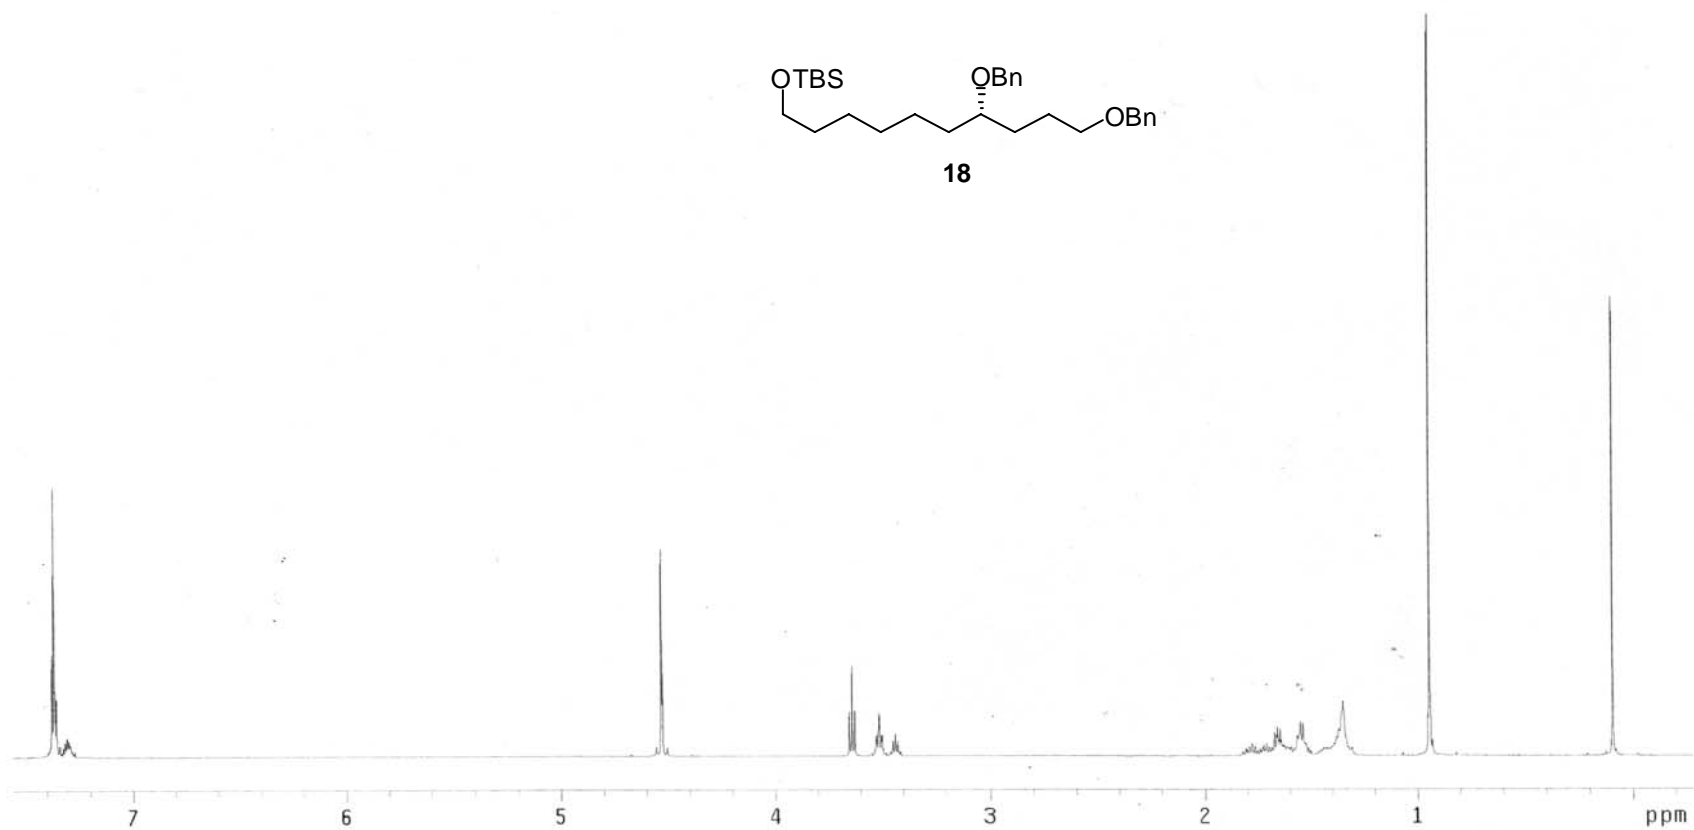

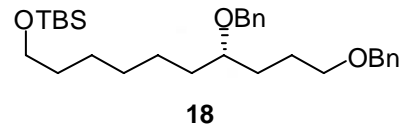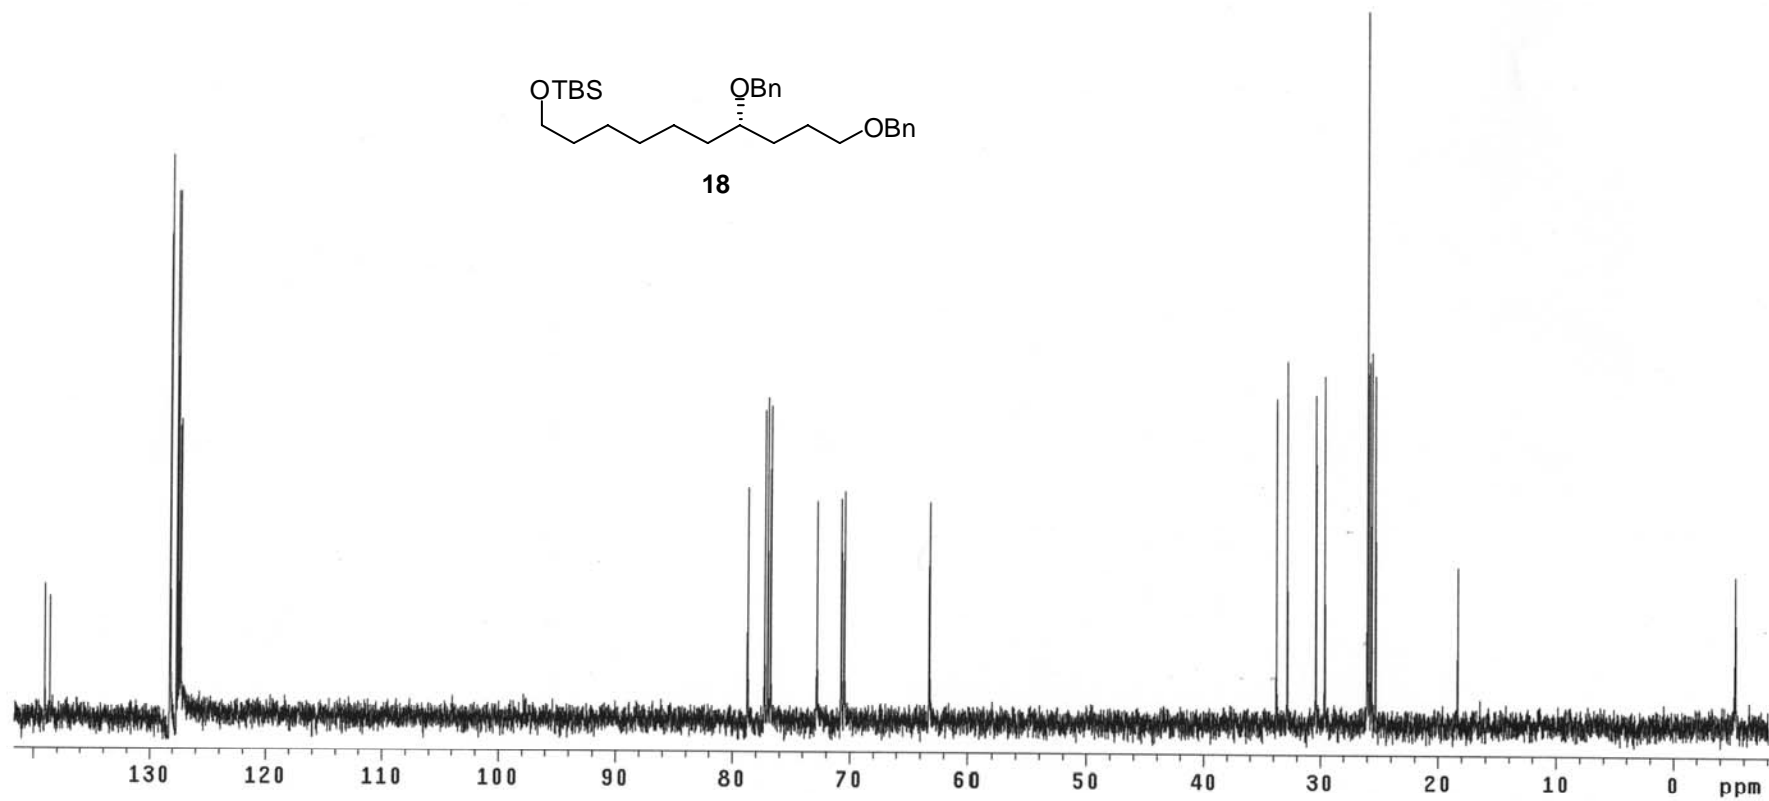

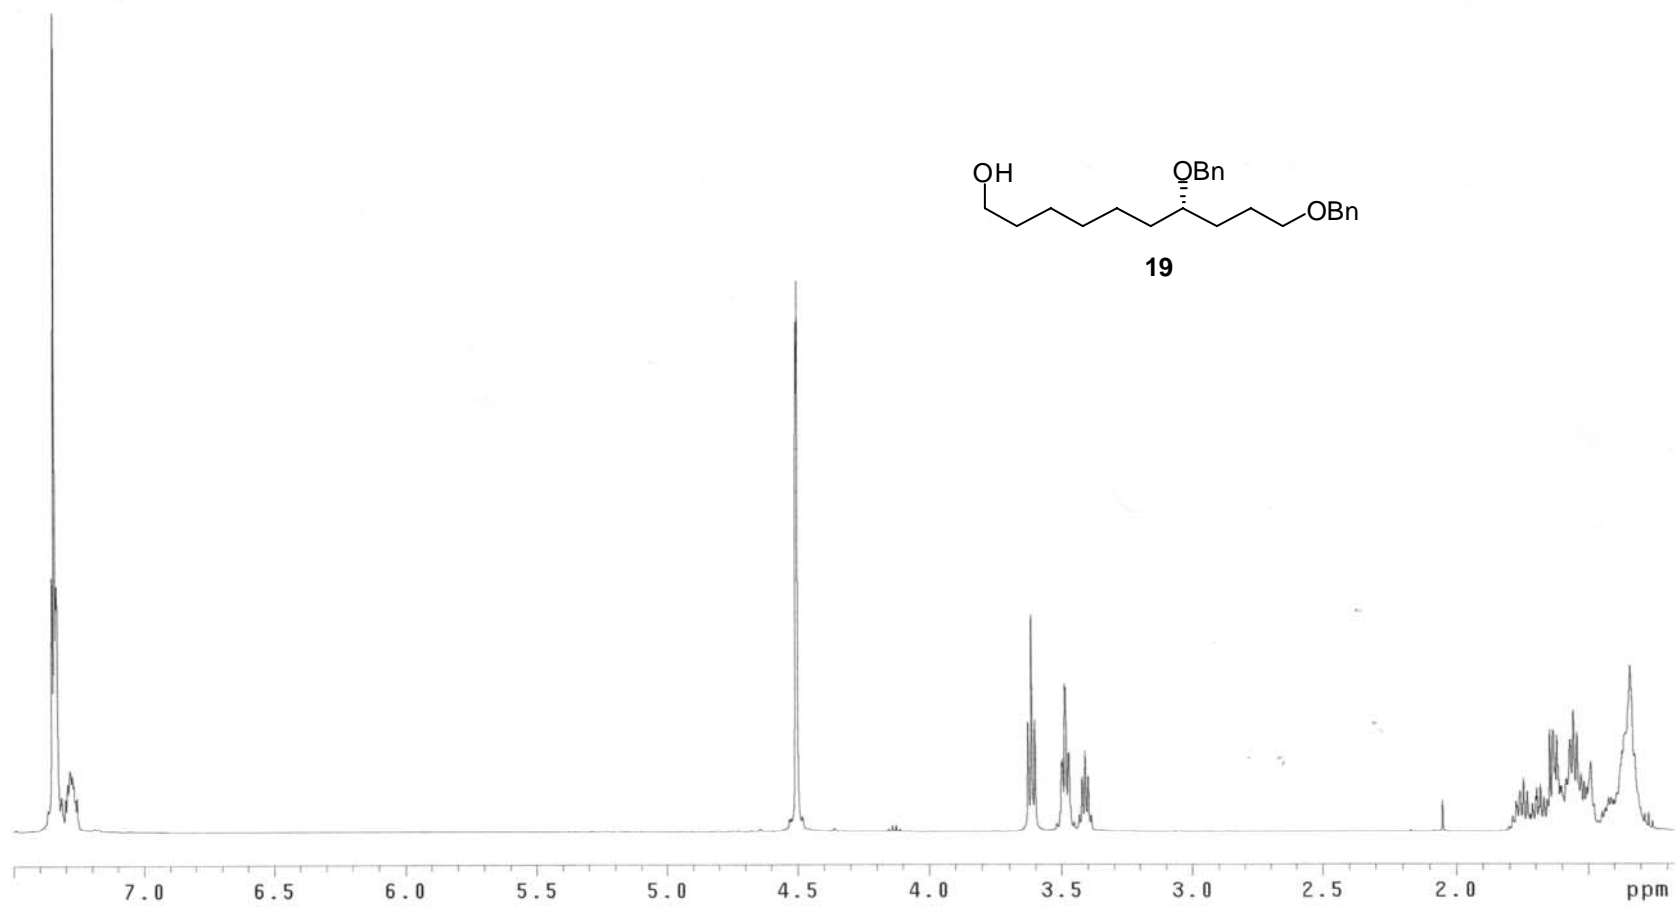

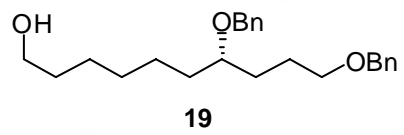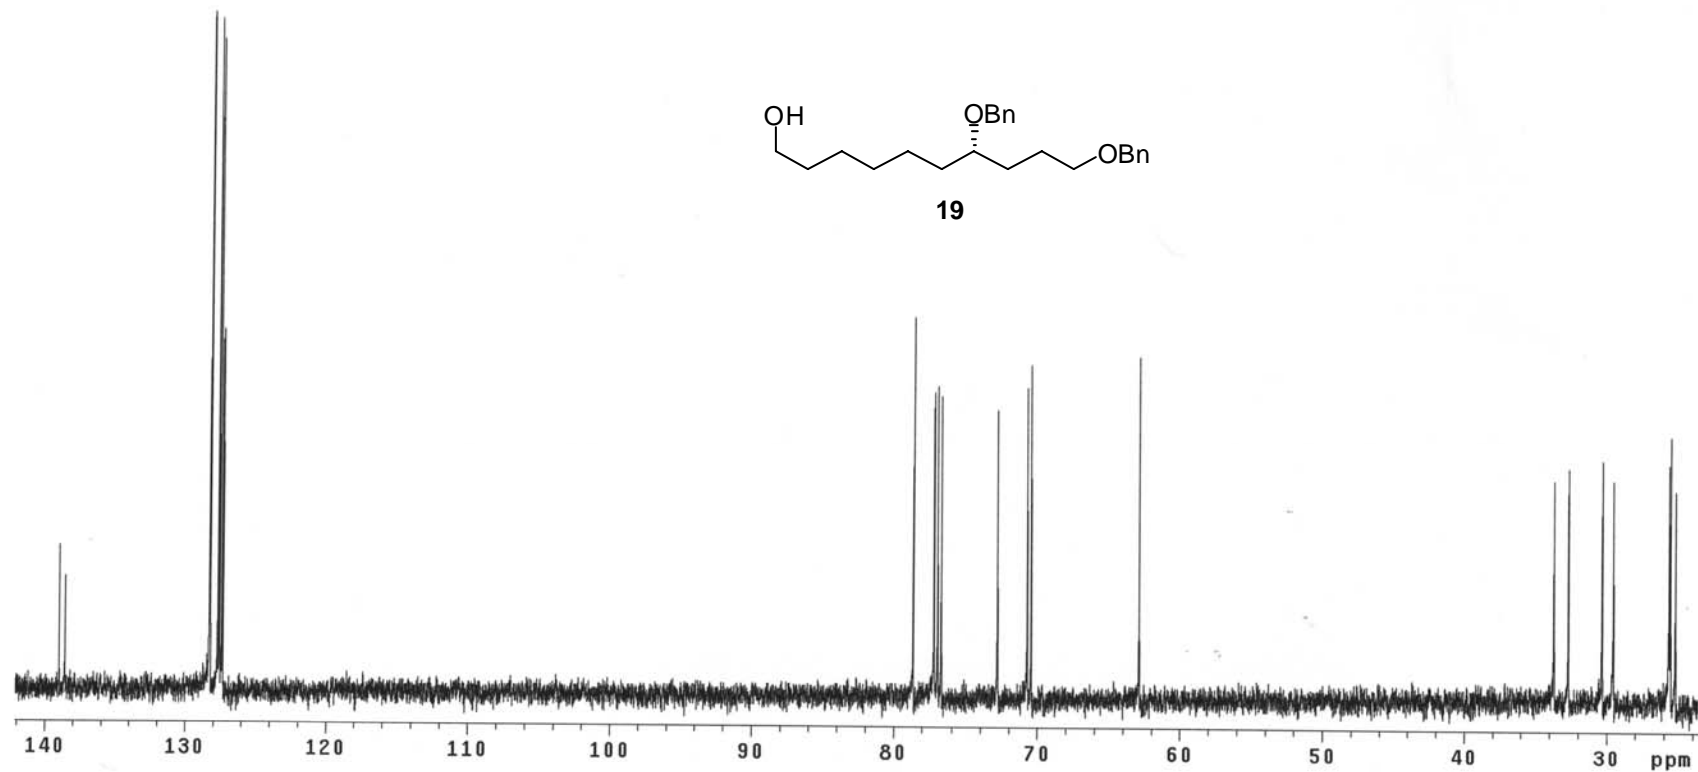

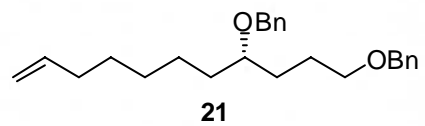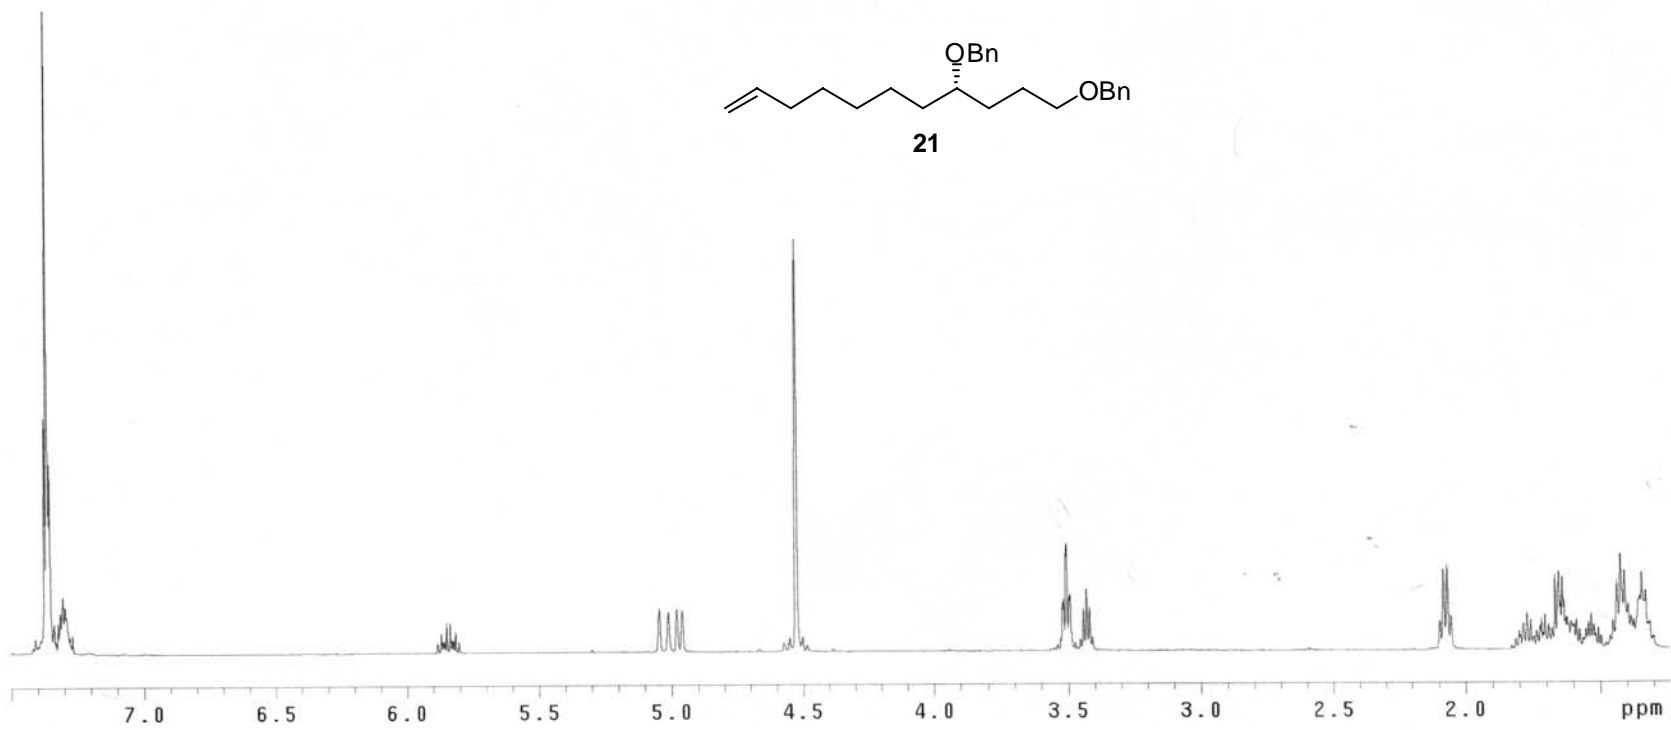

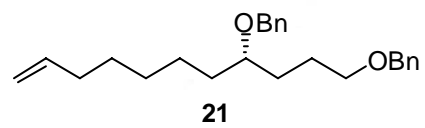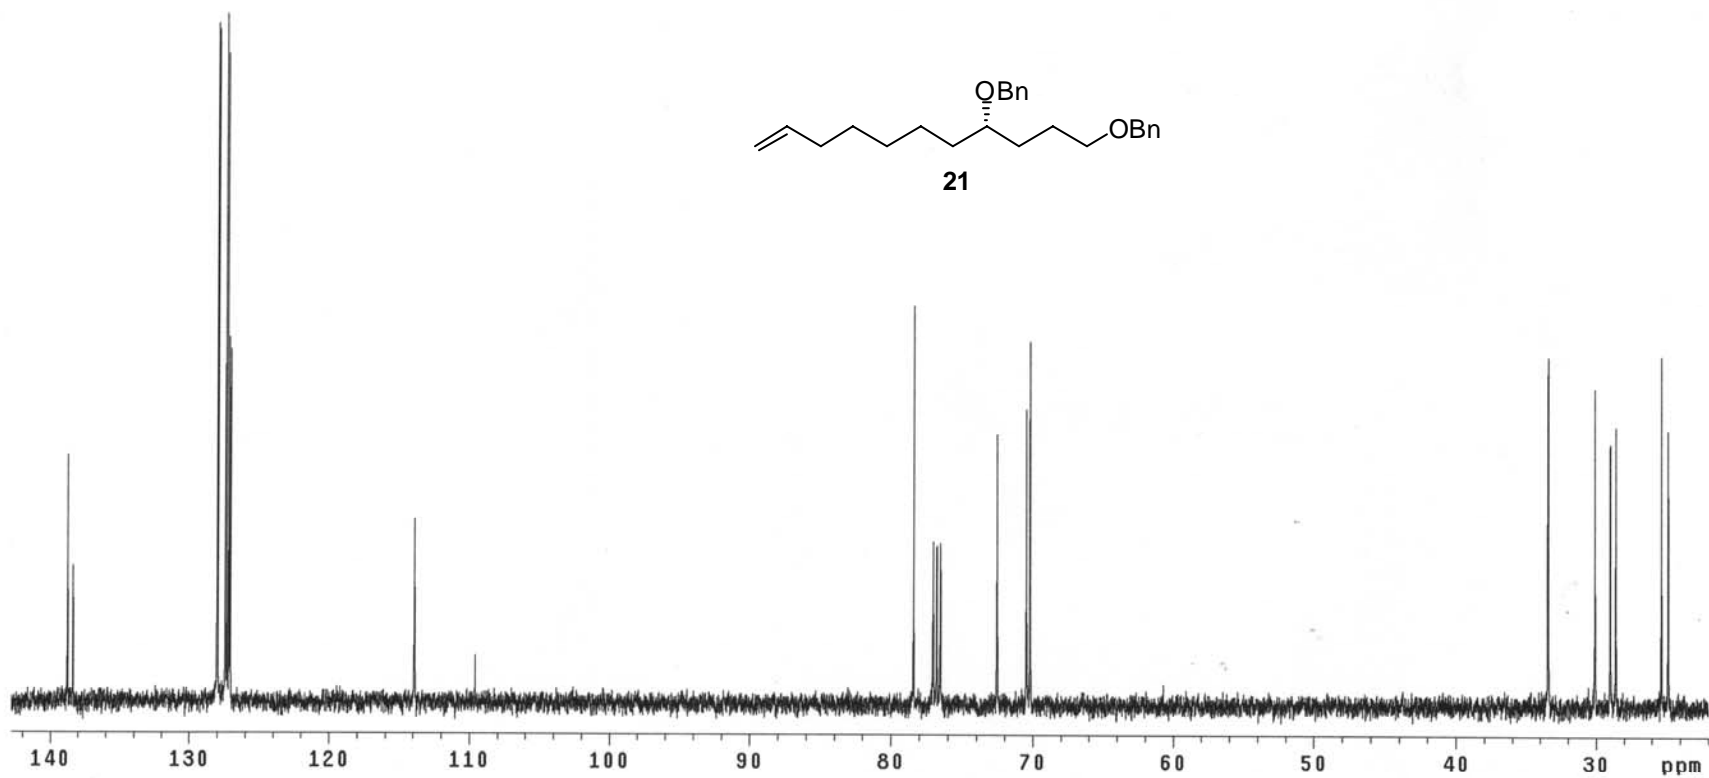

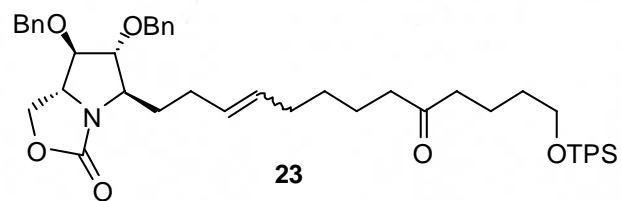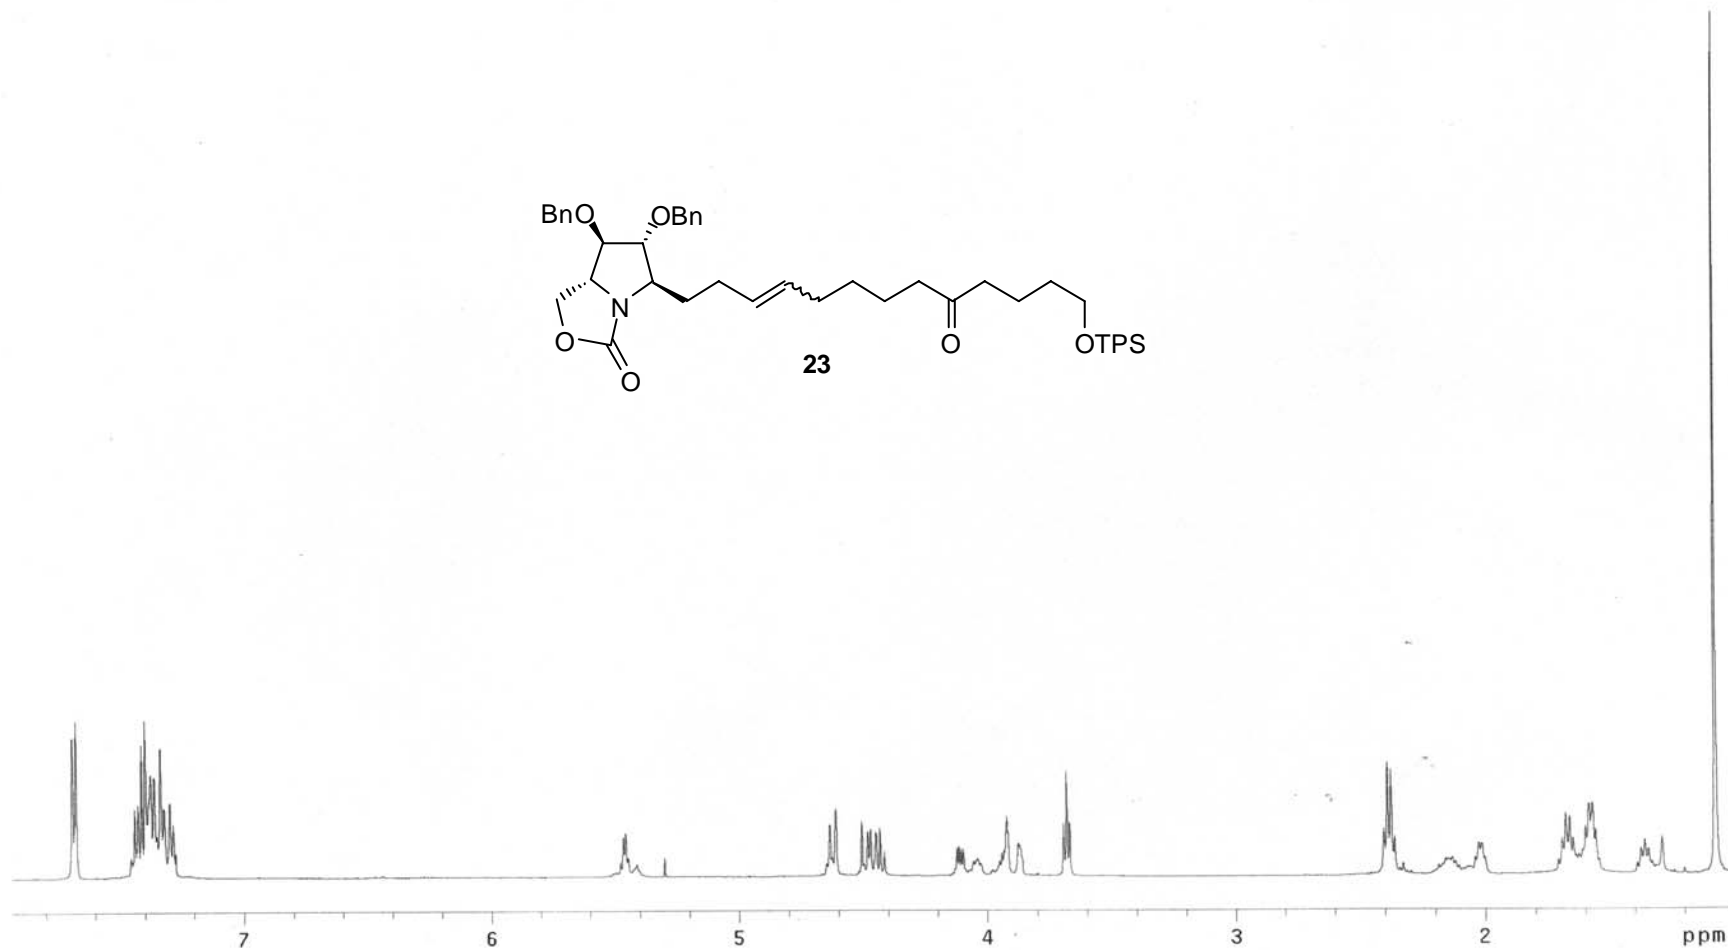



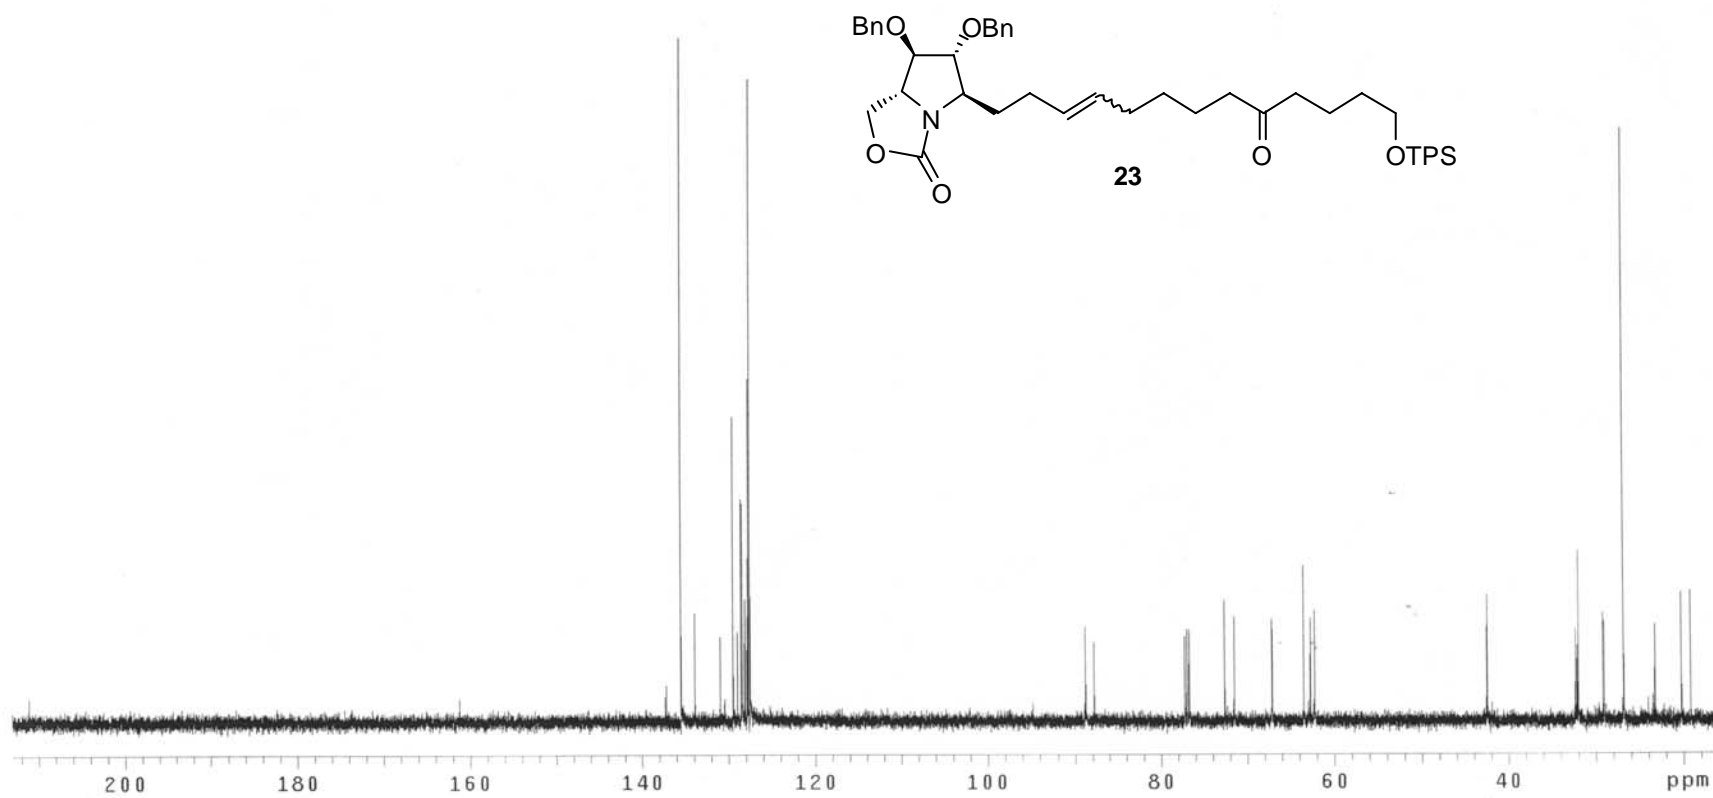

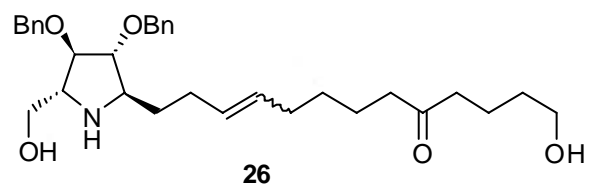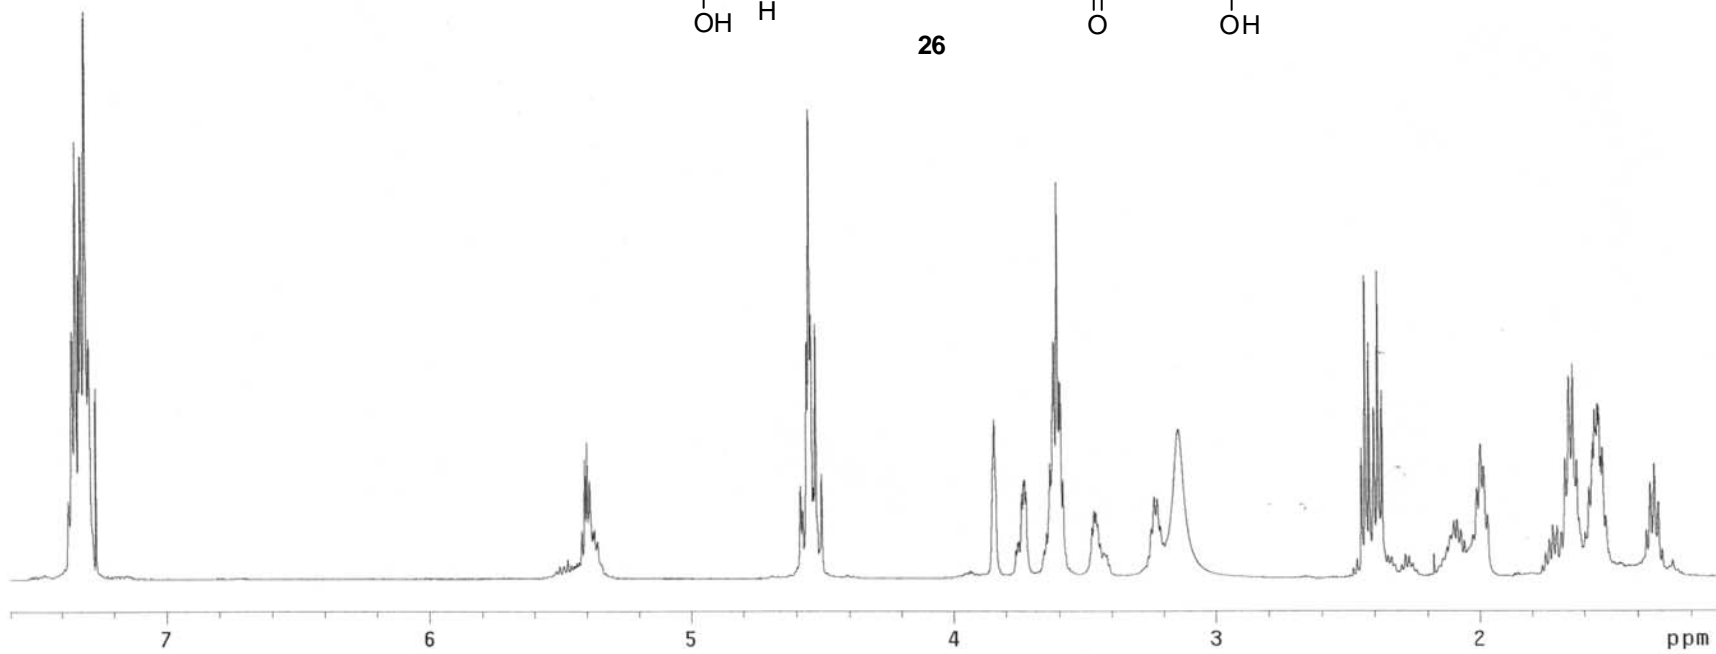

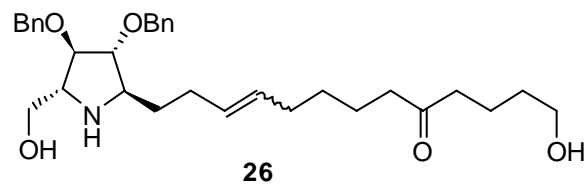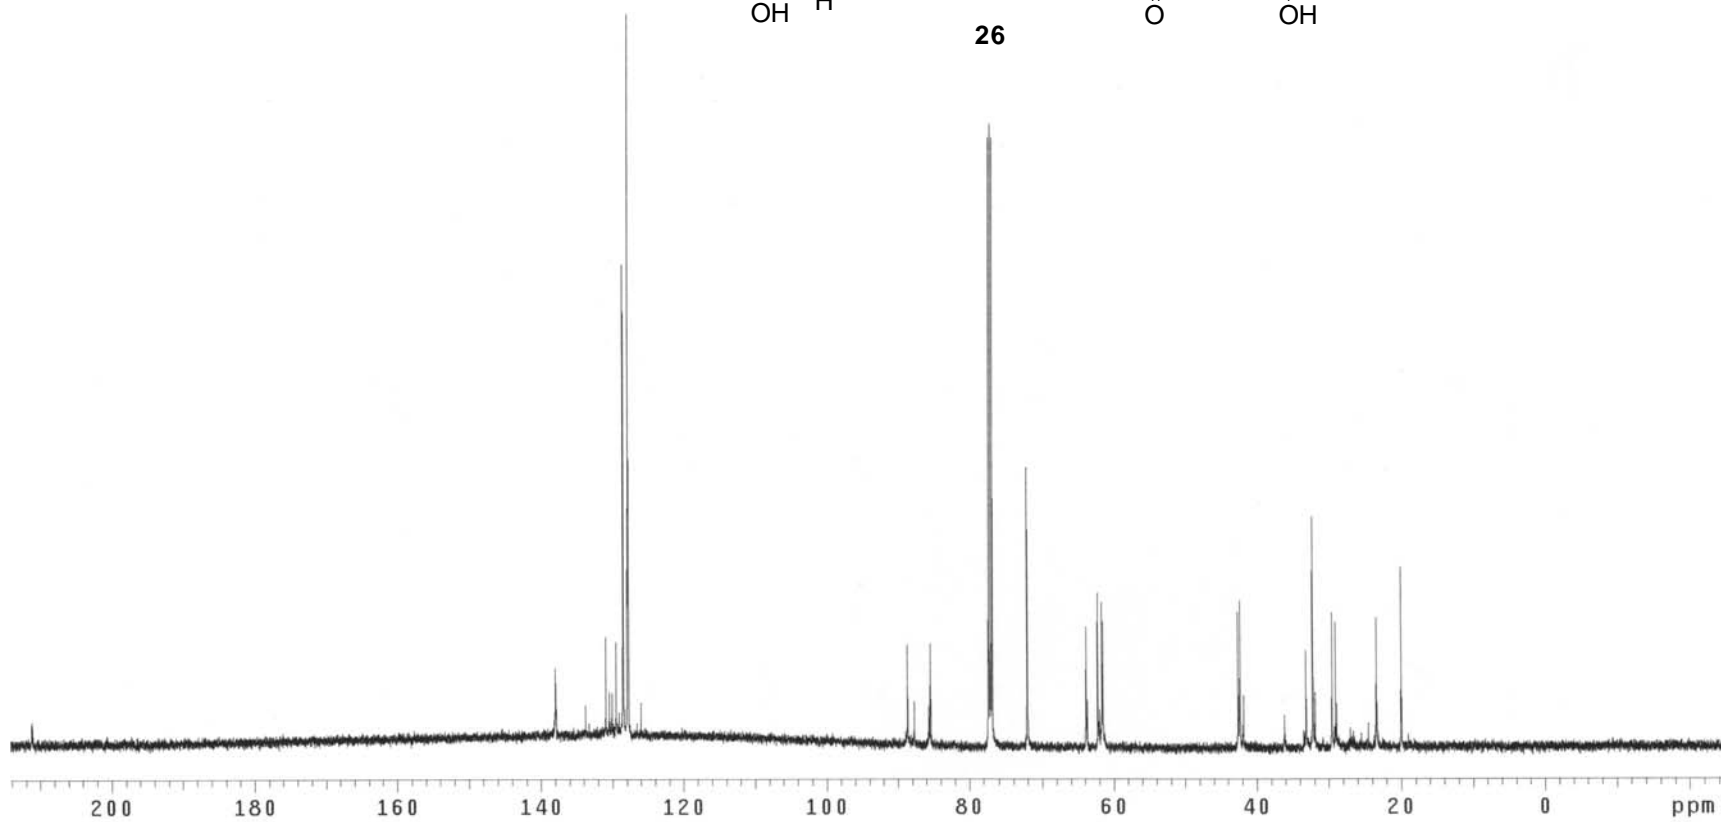

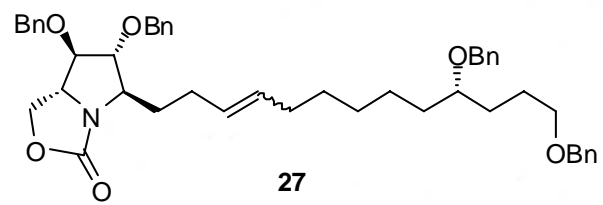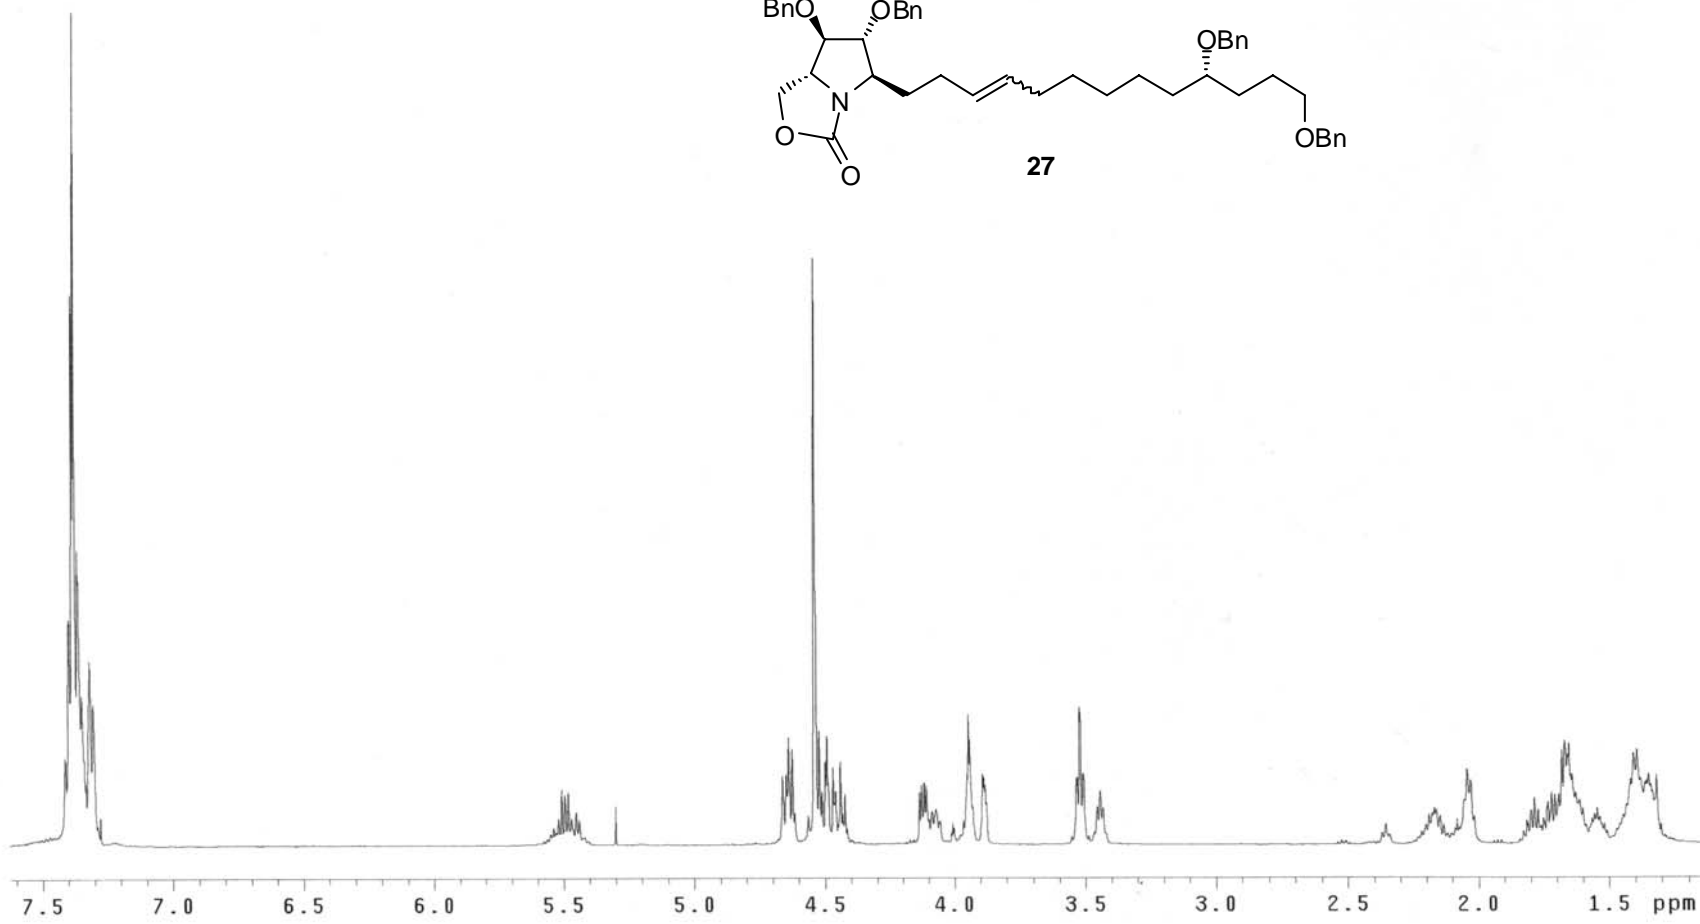

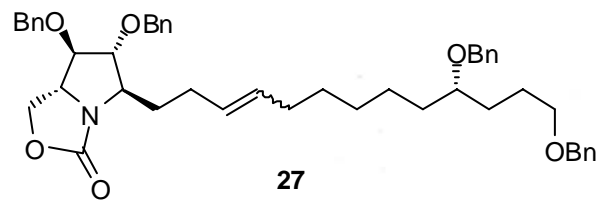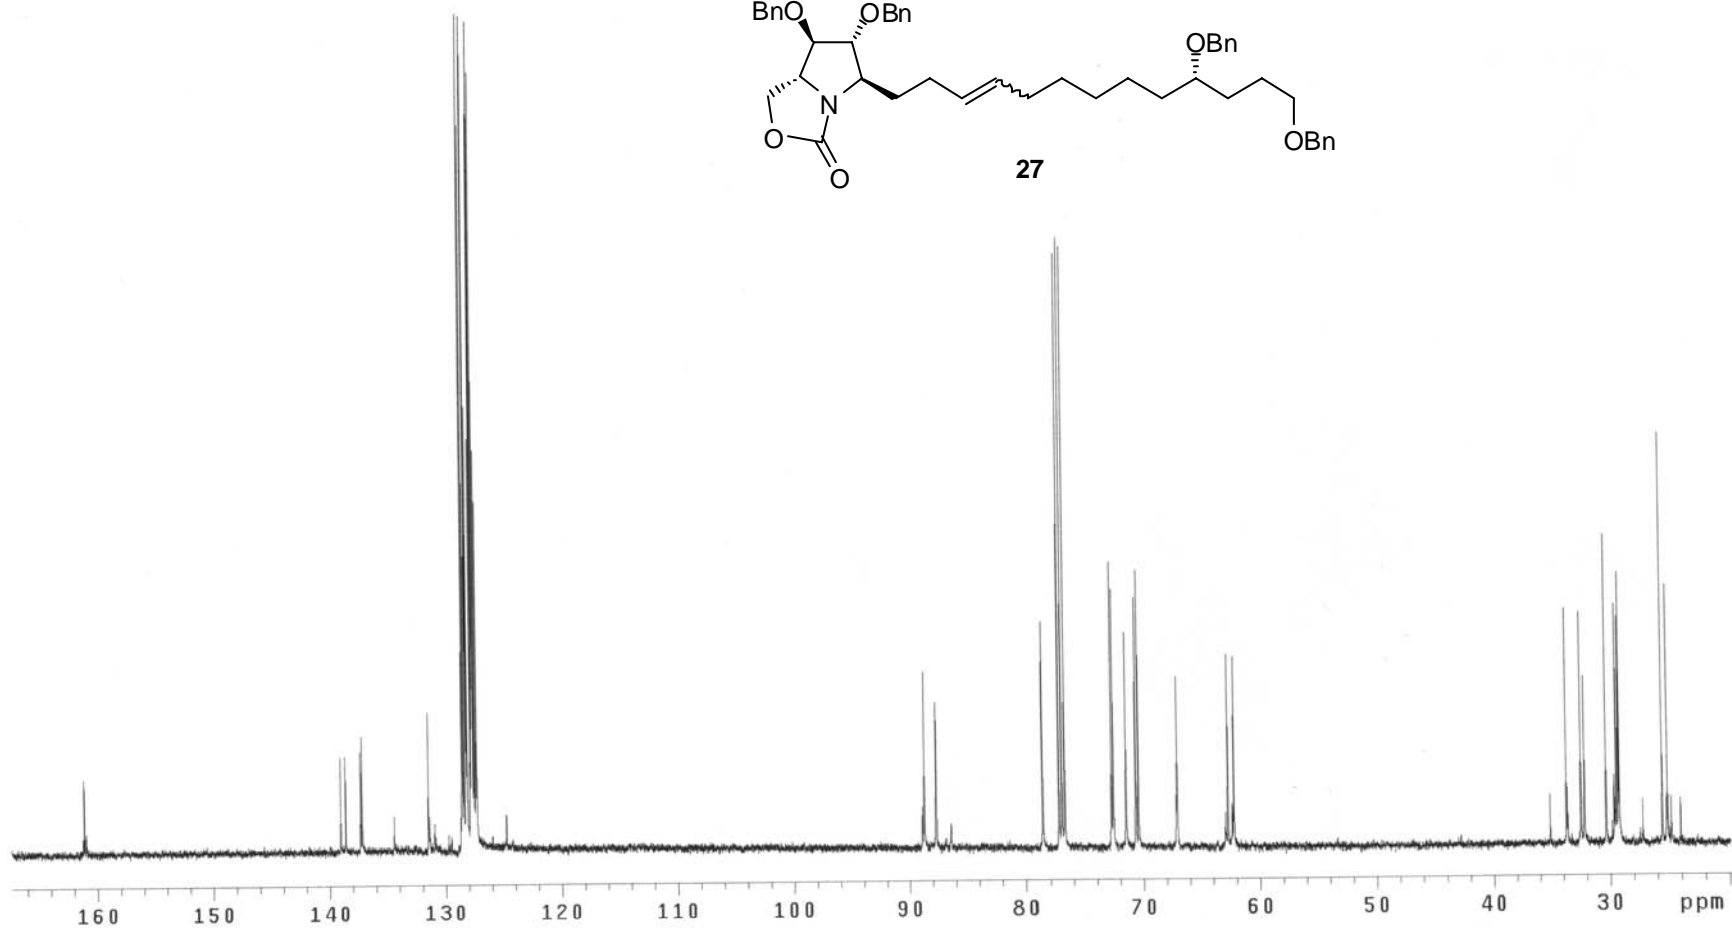

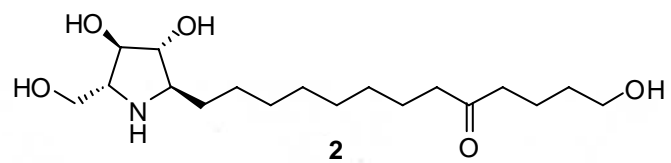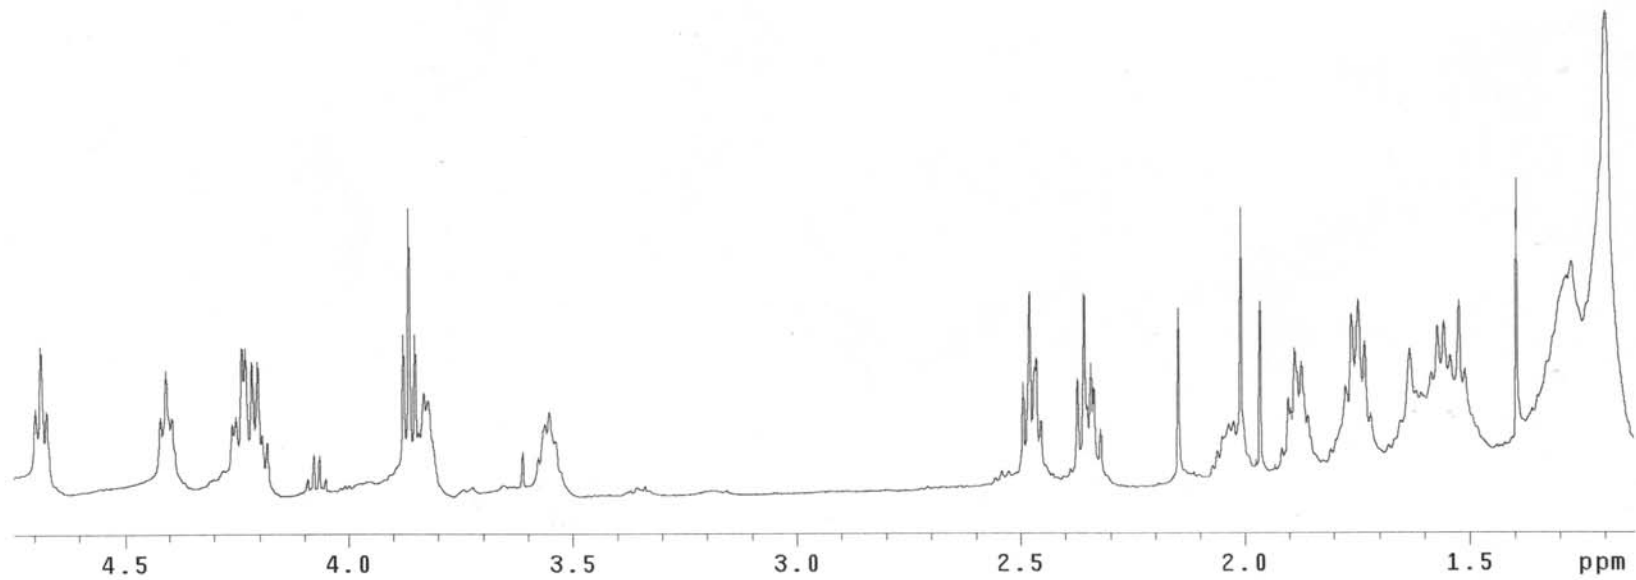

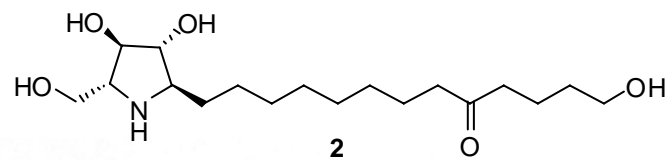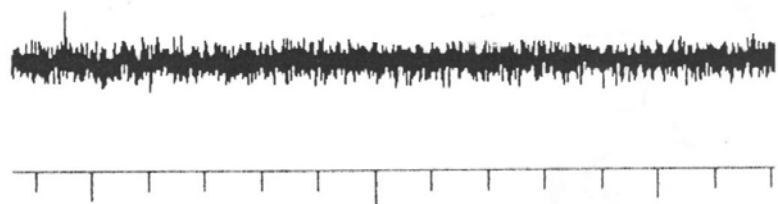

200

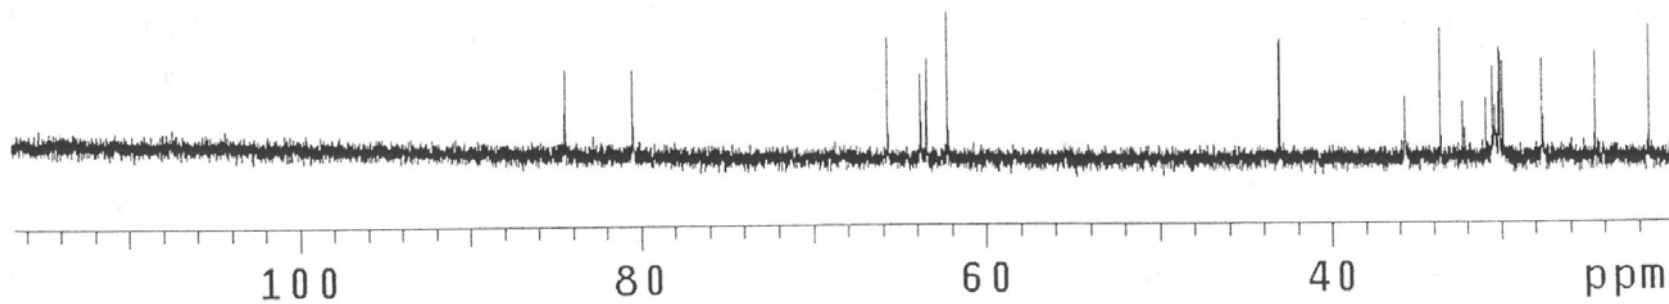

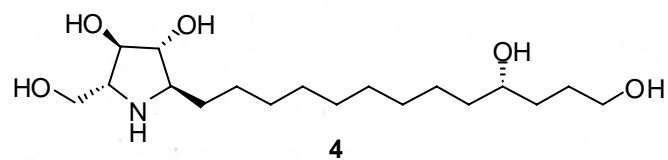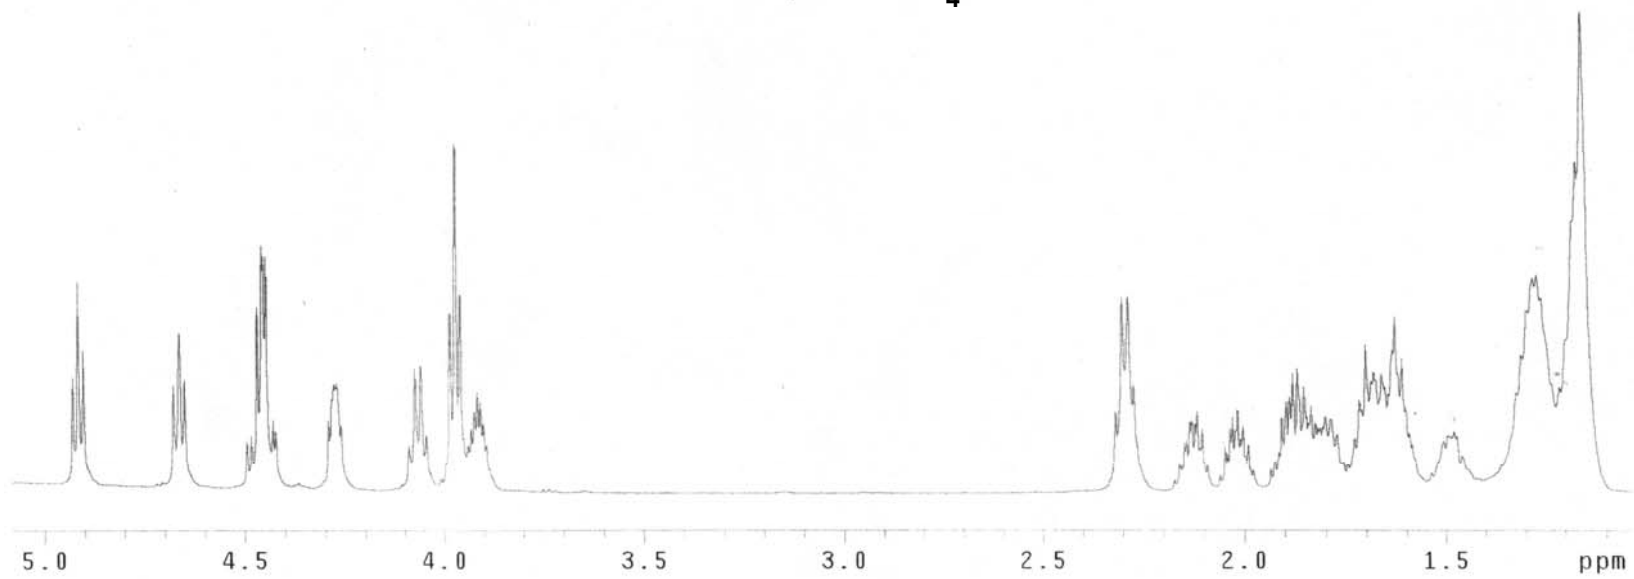



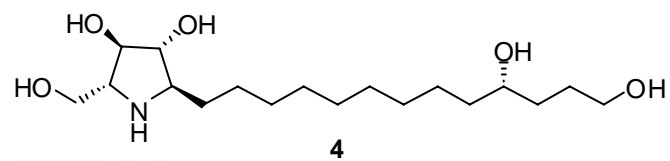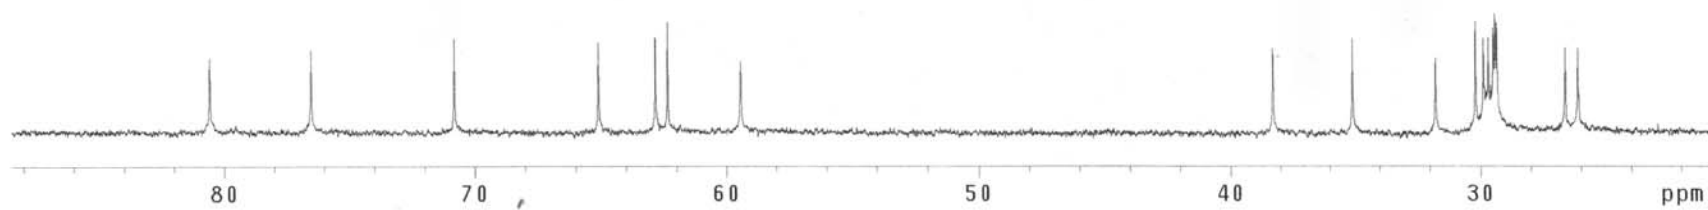

Supplement: b821431j_b.pdf [file b821431j_b.pdf]
